# Supplementary material for: Baseline gene expression and dynamic endocrine therapy use in ER+ breast cancer: associations with recurrence in a real-world cohort
Source: Research Square preprint supplement (doi:10.21203/rs.3.rs-9998817/v1), 2026-06-30
Supplement: Supplementary file 1 [file 000fb25f1f9f71a03372fe3c.docx]

**Baseline gene expression and dynamic endocrine therapy use in ER+ breast cancer: associations with recurrence in a real-world cohort**

**Supplementary Materials**

**Content**

- Supplementary table 1– Multivariable Cox proportional hazards models for time-to-recurrence with interaction between baseline gene expression and initial endocrine therapy
- Supplementary table 2 – Unadjusted associations between clinical characteristics and study outcomes from bivariate Cox proportional hazards models
- Supplementary table 3 – Unadjusted Cox proportional hazards models for time-to-recurrence with interaction between baseline gene expression and initial endocrine therapy
- Supplementary table 4 – Multivariable Cox proportional hazards models for time-to-recurrence with interaction between baseline gene expression and initial endocrine therapy for postmenopausal cohort
- Supplementary table 5 – Distribution of endocrine therapy–related symptoms and endocrine therapy agents by endocrine therapy class pattern
- Supplementary table 6 – Multivariable Cox proportional hazards models for time-to-switch with interaction between baseline gene expression and initial endocrine therapy
- Supplementary table 7 – Multivariable Cox proportional hazards models for time-to-switch with interaction between baseline gene expression and current endocrine therapy

**Table S1.** Multivariable Cox proportional hazards models for time-to-recurrence with interaction between baseline gene expression and initial endocrine therapy

| **Gene** | **Initial endocrine therapy type** | **Hazard ratio (95% CI)** | **P value (raw)** | **P value (adjusted)** |
| --- | --- | --- | --- | --- |
| *TP53* | AI-initiated | 0.68 (0.43, 1.08) | 0.1053 | 0.4124 |
| SERM-initiated | 5.5 (1.91, 15.86) | 0.0016 | 0.0357 |
| Interaction | 8.09 (2.56, 25.57) | 0.0004 | 0.0207 |
| *WNT7B* | AI-initiated | 1.05 (0.77, 1.45) | 0.7419 | 0.9102 |
| SERM-initiated | 7.07 (2.6, 19.26) | 0.0001 | 0.0167 |
| Interaction | 6.71 (2.34, 19.18) | 0.0004 | 0.0207 |
| *UBE2T* | AI-initiated | 0.95 (0.54, 1.65) | 0.8505 | 0.9647 |
| SERM-initiated | 5.31 (2.4, 11.77) | 0.0000 | 0.0073 |
| Interaction | 5.61 (2.07, 15.21) | 0.0007 | 0.0260 |
| *BAG1* | AI-initiated | 0.82 (0.57, 1.18) | 0.2892 | 0.6890 |
| SERM-initiated | 4.72 (1.79, 12.42) | 0.0017 | 0.0361 |
| Interaction | 5.75 (2.08, 15.88) | 0.0007 | 0.0260 |
| *ACTR3B* | AI-initiated | 0.47 (0.19, 1.19) | 0.1117 | 0.4227 |
| SERM-initiated | 2.53 (1.43, 4.47) | 0.0014 | 0.0357 |
| Interaction | 5.33 (1.95, 14.51) | 0.0011 | 0.0317 |
| *PIK3R5* | AI-initiated | 2.06 (1.27, 3.33) | 0.0035 | 0.0642 |
| SERM-initiated | 0.64 (0.3, 1.4) | 0.2643 | 0.6563 |
| Interaction | 0.31 (0.13, 0.73) | 0.0068 | 0.1093 |
| *MELK* | AI-initiated | 0.95 (0.5, 1.8) | 0.8756 | 0.9700 |
| SERM-initiated | 2.71 (1.58, 4.65) | 0.0003 | 0.0207 |
| Interaction | 2.85 (1.31, 6.2) | 0.0084 | 0.1169 |
| *CCND1* | AI-initiated | 0.02 (0, 0.64) | 0.0268 | 0.2391 |
| SERM-initiated | 1.64 (1.24, 2.16) | 0.0005 | 0.0207 |
| Interaction | 76.89 (2.37, 2496.18) | 0.0145 | 0.1735 |
| *MMP11* | AI-initiated | 0.43 (0.12, 1.45) | 0.1720 | 0.5371 |
| SERM-initiated | 2.87 (1.11, 7.42) | 0.0300 | 0.2573 |
| Interaction | 6.74 (1.41, 32.16) | 0.0168 | 0.1870 |
| *MAPT* | AI-initiated | 0.76 (0.37, 1.54) | 0.4405 | 0.7655 |
| SERM-initiated | 2.64 (1.18, 5.92) | 0.0185 | 0.1870 |
| Interaction | 3.5 (1.25, 9.79) | 0.0172 | 0.1870 |
| *KRT17* | AI-initiated | 0.51 (0.25, 1.01) | 0.0529 | 0.3036 |
| SERM-initiated | 1.43 (0.89, 2.31) | 0.1429 | 0.4812 |
| Interaction | 2.83 (1.2, 6.69) | 0.0180 | 0.1870 |
| *FOXA1* | AI-initiated | 0.81 (0.46, 1.43) | 0.4690 | 0.7680 |
| SERM-initiated | 3.16 (1.26, 7.92) | 0.0141 | 0.1735 |
| Interaction | 3.89 (1.25, 12.18) | 0.0195 | 0.1916 |
| *BRCA1* | AI-initiated | 0.62 (0.27, 1.44) | 0.2677 | 0.6563 |
| SERM-initiated | 2.61 (1.07, 6.38) | 0.0350 | 0.2594 |
| Interaction | 4.2 (1.24, 14.2) | 0.0209 | 0.2005 |
| *IGF1* | AI-initiated | 1.92 (0.91, 4.08) | 0.0891 | 0.3952 |
| SERM-initiated | 0.56 (0.23, 1.38) | 0.2067 | 0.5838 |
| Interaction | 0.29 (0.1, 0.85) | 0.0234 | 0.2196 |
| *CDC6* | AI-initiated | 0.86 (0.47, 1.56) | 0.6181 | 0.8446 |
| SERM-initiated | 2.57 (1.07, 6.18) | 0.0341 | 0.2594 |
| Interaction | 3 (1.11, 8.12) | 0.0308 | 0.2573 |
| *ITPR1* | AI-initiated | 1.15 (0.89, 1.48) | 0.3022 | 0.6973 |
| SERM-initiated | 0.23 (0.06, 0.95) | 0.0418 | 0.2786 |
| Interaction | 0.2 (0.05, 0.87) | 0.0315 | 0.2573 |
| *UBE2C* | AI-initiated | 1.21 (0.74, 1.97) | 0.4479 | 0.7680 |
| SERM-initiated | 2.95 (1.55, 5.62) | 0.0010 | 0.0317 |
| Interaction | 2.44 (1.07, 5.55) | 0.0335 | 0.2594 |
| *MKI67* | AI-initiated | 1.03 (0.57, 1.88) | 0.9164 | 0.9857 |
| SERM-initiated | 2.68 (1.47, 4.89) | 0.0013 | 0.0349 |
| Interaction | 2.6 (1.07, 6.33) | 0.0355 | 0.2594 |
| *CDCA1* | AI-initiated | 1.05 (0.64, 1.73) | 0.8513 | 0.9647 |
| SERM-initiated | 2.26 (1.43, 3.57) | 0.0005 | 0.0207 |
| Interaction | 2.15 (1.05, 4.4) | 0.0358 | 0.2594 |
| *MYBL2* | AI-initiated | 0.62 (0.3, 1.3) | 0.2068 | 0.5838 |
| SERM-initiated | 1.92 (0.87, 4.23) | 0.1042 | 0.4124 |
| Interaction | 3.09 (1.06, 9.01) | 0.0393 | 0.2745 |
| *PSPHL* | AI-initiated | 0.61 (0.23, 1.61) | 0.3178 | 0.7094 |
| SERM-initiated | 1.85 (1.17, 2.91) | 0.0083 | 0.1169 |
| Interaction | 3.03 (1.03, 8.86) | 0.0434 | 0.2823 |
| *TP63* | AI-initiated | 0.72 (0.33, 1.59) | 0.4194 | 0.7524 |
| SERM-initiated | 5.85 (0.95, 35.98) | 0.0566 | 0.3045 |
| Interaction | 8.09 (1.04, 63.15) | 0.0462 | 0.2911 |
| *ANLN* | AI-initiated | 1.03 (0.51, 2.07) | 0.9389 | 0.9887 |
| SERM-initiated | 2.65 (1.41, 4.98) | 0.0026 | 0.0493 |
| Interaction | 2.58 (1, 6.63) | 0.0499 | 0.3036 |
| *MTOR* | AI-initiated | 0.72 (0.44, 1.19) | 0.2016 | 0.5838 |
| SERM-initiated | 1.8 (0.77, 4.24) | 0.1771 | 0.5485 |
| Interaction | 2.49 (0.99, 6.26) | 0.0524 | 0.3036 |
| *KRT14* | AI-initiated | 0.85 (0.55, 1.32) | 0.4792 | 0.7731 |
| SERM-initiated | 7.11 (0.87, 57.99) | 0.0669 | 0.3337 |
| Interaction | 8.33 (0.98, 71.16) | 0.0526 | 0.3036 |
| *CEP55* | AI-initiated | 1.02 (0.63, 1.67) | 0.9273 | 0.9883 |
| SERM-initiated | 2.8 (1.19, 6.57) | 0.0183 | 0.1870 |
| Interaction | 2.73 (0.98, 7.59) | 0.0538 | 0.3036 |
| *WNT11* | AI-initiated | 3.17 (1.45, 6.93) | 0.0038 | 0.0669 |
| SERM-initiated | 1.49 (1.24, 1.81) | 0.0000 | 0.0073 |
| Interaction | 0.47 (0.22, 1.02) | 0.0553 | 0.3045 |
| *PIK3R2* | AI-initiated | 0.9 (0.54, 1.49) | 0.6719 | 0.8578 |
| SERM-initiated | 2.31 (1.04, 5.16) | 0.0403 | 0.2763 |
| Interaction | 2.58 (0.98, 6.81) | 0.0556 | 0.3045 |
| *CDCA8* | AI-initiated | 1.01 (0.54, 1.88) | 0.9808 | 0.9987 |
| SERM-initiated | 2.43 (1.17, 5.05) | 0.0179 | 0.1870 |
| Interaction | 2.41 (0.97, 5.95) | 0.0571 | 0.3045 |
| *ORC6L* | AI-initiated | 0.77 (0.38, 1.57) | 0.4680 | 0.7680 |
| SERM-initiated | 1.66 (0.94, 2.94) | 0.0794 | 0.3862 |
| Interaction | 2.17 (0.96, 4.87) | 0.0613 | 0.3226 |
| *GRB7* | AI-initiated | 0.53 (0.19, 1.47) | 0.2205 | 0.5994 |
| SERM-initiated | 1.87 (0.99, 3.52) | 0.0535 | 0.3036 |
| Interaction | 3.55 (0.93, 13.51) | 0.0629 | 0.3263 |
| *KIF2C* | AI-initiated | 0.85 (0.42, 1.7) | 0.6433 | 0.8446 |
| SERM-initiated | 1.91 (1.01, 3.61) | 0.0462 | 0.2911 |
| Interaction | 2.25 (0.94, 5.4) | 0.0693 | 0.3410 |
| *TMEM45B* | AI-initiated | 1.85 (1.18, 2.88) | 0.0067 | 0.1093 |
| SERM-initiated | 1.05 (0.64, 1.71) | 0.8567 | 0.9647 |
| Interaction | 0.57 (0.3, 1.07) | 0.0807 | 0.3873 |
| *CENPF* | AI-initiated | 1.25 (0.74, 2.1) | 0.4085 | 0.7524 |
| SERM-initiated | 2.91 (1.31, 6.45) | 0.0085 | 0.1169 |
| Interaction | 2.34 (0.89, 6.17) | 0.0862 | 0.3952 |
| *RRM2* | AI-initiated | 1.08 (0.65, 1.78) | 0.7775 | 0.9272 |
| SERM-initiated | 2.53 (1.09, 5.85) | 0.0306 | 0.2573 |
| Interaction | 2.35 (0.88, 6.26) | 0.0875 | 0.3952 |
| *CD8A* | AI-initiated | 1.25 (0.8, 1.96) | 0.3218 | 0.7094 |
| SERM-initiated | 0.52 (0.22, 1.25) | 0.1469 | 0.4848 |
| Interaction | 0.42 (0.15, 1.14) | 0.0876 | 0.3952 |
| *APOE* | AI-initiated | 1.12 (0.67, 1.88) | 0.6566 | 0.8501 |
| SERM-initiated | 0.49 (0.21, 1.14) | 0.0961 | 0.3952 |
| Interaction | 0.43 (0.16, 1.15) | 0.0925 | 0.3952 |
| *CXXC5* | AI-initiated | 0.56 (0.27, 1.17) | 0.1220 | 0.4418 |
| SERM-initiated | 1.23 (0.73, 2.07) | 0.4310 | 0.7524 |
| Interaction | 2.19 (0.87, 5.5) | 0.0969 | 0.3952 |
| *HMGA2* | AI-initiated | 0.75 (0.33, 1.73) | 0.5055 | 0.7857 |
| SERM-initiated | 2.11 (1.03, 4.33) | 0.0421 | 0.2786 |
| Interaction | 2.79 (0.83, 9.43) | 0.0976 | 0.3952 |
| *CDH3* | AI-initiated | 0.68 (0.32, 1.42) | 0.3024 | 0.6973 |
| SERM-initiated | 1.53 (0.88, 2.67) | 0.1351 | 0.4672 |
| Interaction | 2.27 (0.86, 5.97) | 0.0978 | 0.3952 |
| *FGFR3* | AI-initiated | 0.5 (0.22, 1.12) | 0.0918 | 0.3952 |
| SERM-initiated | 1.36 (0.59, 3.15) | 0.4751 | 0.7697 |
| Interaction | 2.72 (0.83, 8.95) | 0.0991 | 0.3964 |
| *TOP2A* | AI-initiated | 1.07 (0.55, 2.1) | 0.8327 | 0.9647 |
| SERM-initiated | 2.19 (1.2, 3.98) | 0.0105 | 0.1368 |
| Interaction | 2.03 (0.86, 4.83) | 0.1081 | 0.4193 |
| *WNT5A* | AI-initiated | 0.56 (0.28, 1.1) | 0.0935 | 0.3952 |
| SERM-initiated | 1.58 (0.52, 4.78) | 0.4179 | 0.7524 |
| Interaction | 2.83 (0.79, 10.11) | 0.1098 | 0.4217 |
| *BIRC5* | AI-initiated | 0.69 (0.32, 1.5) | 0.3475 | 0.7094 |
| SERM-initiated | 1.55 (0.78, 3.1) | 0.2107 | 0.5905 |
| Interaction | 2.26 (0.81, 6.26) | 0.1185 | 0.4339 |
| *TFF1* | AI-initiated | 0.91 (0.55, 1.5) | 0.7042 | 0.8812 |
| SERM-initiated | 1.94 (1.03, 3.63) | 0.0389 | 0.2745 |
| Interaction | 2.14 (0.82, 5.54) | 0.1186 | 0.4339 |
| *KNTC2* | AI-initiated | 1 (0.55, 1.84) | 0.9923 | 0.9987 |
| SERM-initiated | 2.18 (0.95, 4.98) | 0.0655 | 0.3309 |
| Interaction | 2.17 (0.79, 5.95) | 0.1320 | 0.4672 |
| *SYTL4* | AI-initiated | 0.34 (0.12, 0.93) | 0.0355 | 0.2594 |
| SERM-initiated | 0.79 (0.4, 1.59) | 0.5156 | 0.7857 |
| Interaction | 2.34 (0.77, 7.09) | 0.1333 | 0.4672 |
| *MIA* | AI-initiated | 0.8 (0.36, 1.76) | 0.5830 | 0.8291 |
| SERM-initiated | 1.68 (0.89, 3.21) | 0.1123 | 0.4227 |
| Interaction | 2.1 (0.76, 5.81) | 0.1530 | 0.4980 |
| *VRD* | AI-initiated | 0.99 (0.77, 1.29) | 0.9526 | 0.9887 |
| SERM-initiated | 5.08 (0.52, 49.44) | 0.1612 | 0.5179 |
| Interaction | 5.12 (0.52, 50.78) | 0.1626 | 0.5179 |
| *CDC20* | AI-initiated | 0.83 (0.39, 1.74) | 0.6146 | 0.8446 |
| SERM-initiated | 1.59 (0.89, 2.84) | 0.1177 | 0.4339 |
| Interaction | 1.93 (0.76, 4.88) | 0.1665 | 0.5242 |
| *CCNE1* | AI-initiated | 0.8 (0.51, 1.26) | 0.3360 | 0.7094 |
| SERM-initiated | 1.4 (0.7, 2.76) | 0.3390 | 0.7094 |
| Interaction | 1.74 (0.77, 3.94) | 0.1825 | 0.5594 |
| *EZH2* | AI-initiated | 1.2 (0.75, 1.91) | 0.4560 | 0.7680 |
| SERM-initiated | 1.9 (1.16, 3.12) | 0.0107 | 0.1368 |
| Interaction | 1.59 (0.79, 3.21) | 0.1931 | 0.5760 |
| *PRKCA* | AI-initiated | 1.08 (0.47, 2.49) | 0.8527 | 0.9647 |
| SERM-initiated | 0.63 (0.34, 1.17) | 0.1417 | 0.4812 |
| Interaction | 0.58 (0.26, 1.33) | 0.2004 | 0.5838 |
| *CCNB1* | AI-initiated | 1.16 (0.64, 2.09) | 0.6229 | 0.8446 |
| SERM-initiated | 2.18 (0.99, 4.82) | 0.0534 | 0.3036 |
| Interaction | 1.88 (0.71, 4.97) | 0.2020 | 0.5838 |
| *MDM2* | AI-initiated | 0.79 (0.48, 1.29) | 0.3420 | 0.7094 |
| SERM-initiated | 0.21 (0.03, 1.59) | 0.1306 | 0.4672 |
| Interaction | 0.26 (0.03, 2.21) | 0.2193 | 0.5994 |
| *PIK3R1* | AI-initiated | 1.03 (0.49, 2.18) | 0.9398 | 0.9887 |
| SERM-initiated | 0.42 (0.12, 1.51) | 0.1835 | 0.5594 |
| Interaction | 0.41 (0.1, 1.72) | 0.2216 | 0.5994 |
| *CD49* | AI-initiated | 1.22 (0.61, 2.44) | 0.5747 | 0.8235 |
| SERM-initiated | 0.72 (0.32, 1.58) | 0.4074 | 0.7524 |
| Interaction | 0.59 (0.25, 1.4) | 0.2297 | 0.6095 |
| *WNT4* | AI-initiated | 0.56 (0.26, 1.2) | 0.1344 | 0.4672 |
| SERM-initiated | 1.1 (0.59, 2.06) | 0.7685 | 0.9260 |
| Interaction | 1.97 (0.65, 6.01) | 0.2320 | 0.6095 |
| *ALDH1A1* | AI-initiated | 1.13 (0.64, 1.99) | 0.6649 | 0.8539 |
| SERM-initiated | 0.6 (0.22, 1.65) | 0.3243 | 0.7094 |
| Interaction | 0.53 (0.19, 1.5) | 0.2327 | 0.6095 |
| *WNT10A* | AI-initiated | 0.63 (0.25, 1.64) | 0.3455 | 0.7094 |
| SERM-initiated | 1.57 (0.53, 4.67) | 0.4199 | 0.7524 |
| Interaction | 2.47 (0.56, 10.98) | 0.2333 | 0.6095 |
| *ZEB2* | AI-initiated | 1.44 (0.71, 2.92) | 0.3183 | 0.7094 |
| SERM-initiated | 0.82 (0.38, 1.77) | 0.6091 | 0.8446 |
| Interaction | 0.57 (0.22, 1.45) | 0.2393 | 0.6135 |
| *WNT6* | AI-initiated | 1.26 (0.72, 2.18) | 0.4186 | 0.7524 |
| SERM-initiated | 1.79 (1.32, 2.42) | 0.0002 | 0.0169 |
| Interaction | 1.42 (0.79, 2.57) | 0.2397 | 0.6135 |
| *TYMS* | AI-initiated | 1.13 (0.63, 2.02) | 0.6921 | 0.8713 |
| SERM-initiated | 1.86 (0.9, 3.86) | 0.0945 | 0.3952 |
| Interaction | 1.65 (0.71, 3.88) | 0.2467 | 0.6263 |
| *KRT5* | AI-initiated | 0.87 (0.6, 1.26) | 0.4707 | 0.7680 |
| SERM-initiated | 3.03 (0.39, 23.61) | 0.2894 | 0.6890 |
| Interaction | 3.47 (0.42, 28.67) | 0.2479 | 0.6263 |
| *EXO1* | AI-initiated | 0.96 (0.59, 1.56) | 0.8788 | 0.9700 |
| SERM-initiated | 1.78 (0.68, 4.62) | 0.2377 | 0.6135 |
| Interaction | 1.85 (0.63, 5.4) | 0.2627 | 0.6563 |
| *PIK3CD* | AI-initiated | 1.47 (0.83, 2.62) | 0.1887 | 0.5705 |
| SERM-initiated | 0.91 (0.47, 1.76) | 0.7717 | 0.9260 |
| Interaction | 0.62 (0.26, 1.45) | 0.2683 | 0.6563 |
| *SP110* | AI-initiated | 1.28 (0.71, 2.31) | 0.4097 | 0.7524 |
| SERM-initiated | 0.78 (0.41, 1.49) | 0.4593 | 0.7680 |
| Interaction | 0.61 (0.25, 1.51) | 0.2872 | 0.6890 |
| *PIK3R3* | AI-initiated | 1.45 (0.93, 2.24) | 0.0976 | 0.3952 |
| SERM-initiated | 0.82 (0.32, 2.1) | 0.6724 | 0.8578 |
| Interaction | 0.56 (0.2, 1.63) | 0.2897 | 0.6890 |
| *FOXC1* | AI-initiated | 0.84 (0.49, 1.45) | 0.5275 | 0.7913 |
| SERM-initiated | 0.53 (0.22, 1.26) | 0.1477 | 0.4848 |
| Interaction | 0.63 (0.26, 1.49) | 0.2907 | 0.6890 |
| *PLCB1* | AI-initiated | 1.43 (1.04, 1.97) | 0.0261 | 0.2386 |
| SERM-initiated | 3 (0.84, 10.75) | 0.0912 | 0.3952 |
| Interaction | 2.1 (0.52, 8.45) | 0.2982 | 0.6973 |
| *CCND2* | AI-initiated | 1.09 (0.55, 2.17) | 0.8048 | 0.9464 |
| SERM-initiated | 0.76 (0.4, 1.44) | 0.3959 | 0.7524 |
| Interaction | 0.7 (0.35, 1.39) | 0.3033 | 0.6973 |
| *TWIST1* | AI-initiated | 0.99 (0.55, 1.77) | 0.9662 | 0.9973 |
| SERM-initiated | 0.64 (0.33, 1.25) | 0.1935 | 0.5760 |
| Interaction | 0.65 (0.29, 1.48) | 0.3073 | 0.6982 |
| *AKT3* | AI-initiated | 1.39 (0.75, 2.59) | 0.2995 | 0.6973 |
| SERM-initiated | 2.03 (1.31, 3.13) | 0.0015 | 0.0357 |
| Interaction | 1.46 (0.69, 3.1) | 0.3281 | 0.7094 |
| *PGR* | AI-initiated | 0.18 (0.01, 6.39) | 0.3479 | 0.7094 |
| SERM-initiated | 1.03 (0.59, 1.77) | 0.9291 | 0.9883 |
| Interaction | 5.64 (0.17, 191.96) | 0.3364 | 0.7094 |
| *THY1* | AI-initiated | 1.38 (0.68, 2.81) | 0.3777 | 0.7424 |
| SERM-initiated | 0.94 (0.53, 1.67) | 0.8455 | 0.9647 |
| Interaction | 0.69 (0.31, 1.53) | 0.3584 | 0.7205 |
| *CREBBP* | AI-initiated | 1.58 (0.77, 3.23) | 0.2126 | 0.5917 |
| SERM-initiated | 1.02 (0.55, 1.9) | 0.9508 | 0.9887 |
| Interaction | 0.65 (0.25, 1.67) | 0.3666 | 0.7256 |
| *VIM* | AI-initiated | 1.06 (0.44, 2.55) | 0.8978 | 0.9739 |
| SERM-initiated | 0.75 (0.43, 1.32) | 0.3262 | 0.7094 |
| Interaction | 0.71 (0.32, 1.58) | 0.4041 | 0.7524 |
| *MAPK10* | AI-initiated | 1.1 (0.74, 1.63) | 0.6463 | 0.8446 |
| SERM-initiated | 2.49 (0.37, 16.78) | 0.3490 | 0.7094 |
| Interaction | 2.27 (0.32, 16.1) | 0.4125 | 0.7524 |
| *STAT1* | AI-initiated | 1 (0.65, 1.54) | 0.9996 | 0.9996 |
| SERM-initiated | 0.66 (0.26, 1.7) | 0.3951 | 0.7524 |
| Interaction | 0.66 (0.25, 1.79) | 0.4196 | 0.7524 |
| *CLDN4 (claudin-4)* | AI-initiated | 1.2 (0.71, 2.02) | 0.4920 | 0.7857 |
| SERM-initiated | 1.65 (0.76, 3.57) | 0.2065 | 0.5838 |
| Interaction | 1.37 (0.64, 2.96) | 0.4200 | 0.7524 |
| *HGF* | AI-initiated | 1.15 (0.6, 2.17) | 0.6755 | 0.8589 |
| SERM-initiated | 0.82 (0.41, 1.65) | 0.5769 | 0.8236 |
| Interaction | 0.71 (0.32, 1.62) | 0.4208 | 0.7524 |
| *CLDN7 (claudin-7)* | AI-initiated | 0.95 (0.6, 1.49) | 0.8106 | 0.9464 |
| SERM-initiated | 1.23 (0.66, 2.31) | 0.5104 | 0.7857 |
| Interaction | 1.3 (0.68, 2.49) | 0.4209 | 0.7524 |
| *CD10* | AI-initiated | 0.93 (0.43, 1.99) | 0.8481 | 0.9647 |
| SERM-initiated | 0.65 (0.36, 1.16) | 0.1441 | 0.4812 |
| Interaction | 0.7 (0.29, 1.69) | 0.4241 | 0.7524 |
| *IGF1R* | AI-initiated | 1.16 (0.99, 1.35) | 0.0653 | 0.3309 |
| SERM-initiated | 0.12 (0, 35.84) | 0.4641 | 0.7680 |
| Interaction | 0.1 (0, 29.65) | 0.4307 | 0.7524 |
| *EGFR* | AI-initiated | 1.04 (0.43, 2.51) | 0.9241 | 0.9883 |
| SERM-initiated | 0.6 (0.19, 1.89) | 0.3846 | 0.7478 |
| Interaction | 0.58 (0.15, 2.26) | 0.4310 | 0.7524 |
| *EpCAM* | AI-initiated | 1.32 (0.7, 2.47) | 0.3856 | 0.7478 |
| SERM-initiated | 0.99 (0.5, 1.97) | 0.9833 | 0.9987 |
| Interaction | 0.75 (0.35, 1.62) | 0.4677 | 0.7680 |
| *WNT2* | AI-initiated | 0.9 (0.46, 1.76) | 0.7643 | 0.9260 |
| SERM-initiated | 1.36 (0.48, 3.85) | 0.5576 | 0.8050 |
| Interaction | 1.51 (0.49, 4.65) | 0.4720 | 0.7680 |
| *SNAI2* | AI-initiated | 0.97 (0.47, 1.99) | 0.9250 | 0.9883 |
| SERM-initiated | 0.71 (0.35, 1.45) | 0.3510 | 0.7094 |
| Interaction | 0.74 (0.31, 1.73) | 0.4857 | 0.7804 |
| *PIK3CG* | AI-initiated | 1.03 (0.65, 1.64) | 0.8901 | 0.9715 |
| SERM-initiated | 0.79 (0.4, 1.58) | 0.5062 | 0.7857 |
| Interaction | 0.77 (0.34, 1.71) | 0.5137 | 0.7857 |
| *CK8/18* | AI-initiated | 0.9 (0.58, 1.4) | 0.6486 | 0.8446 |
| SERM-initiated | 1.16 (0.6, 2.25) | 0.6575 | 0.8501 |
| Interaction | 1.29 (0.6, 2.76) | 0.5163 | 0.7857 |
| *PTEN* | AI-initiated | 1.21 (0.69, 2.12) | 0.4969 | 0.7857 |
| SERM-initiated | 0.9 (0.42, 1.93) | 0.7920 | 0.9386 |
| Interaction | 0.74 (0.3, 1.82) | 0.5177 | 0.7857 |
| *ERBB2* | AI-initiated | 0.68 (0.32, 1.46) | 0.3242 | 0.7094 |
| SERM-initiated | 1.01 (0.47, 2.18) | 0.9716 | 0.9975 |
| Interaction | 1.49 (0.44, 5.05) | 0.5267 | 0.7913 |
| *CD24* | AI-initiated | 1.14 (0.64, 2.02) | 0.6597 | 0.8501 |
| SERM-initiated | 0.92 (0.55, 1.53) | 0.7453 | 0.9115 |
| Interaction | 0.81 (0.42, 1.56) | 0.5268 | 0.7913 |
| *CDH1* | AI-initiated | 0.81 (0.47, 1.39) | 0.4436 | 0.7673 |
| SERM-initiated | 1.05 (0.5, 2.2) | 0.8931 | 0.9715 |
| Interaction | 1.3 (0.57, 2.97) | 0.5303 | 0.7924 |
| *SNAI1* | AI-initiated | 0.96 (0.6, 1.56) | 0.8838 | 0.9715 |
| SERM-initiated | 0.75 (0.37, 1.52) | 0.4247 | 0.7524 |
| Interaction | 0.78 (0.35, 1.75) | 0.5410 | 0.7997 |
| *CLDN3 (claudin-3)* | AI-initiated | 0.84 (0.51, 1.36) | 0.4704 | 0.7680 |
| SERM-initiated | 1.07 (0.51, 2.26) | 0.8598 | 0.9654 |
| Interaction | 1.28 (0.58, 2.83) | 0.5436 | 0.7997 |
| *BLVRA* | AI-initiated | 1.25 (0.76, 2.05) | 0.3789 | 0.7424 |
| SERM-initiated | 0.87 (0.3, 2.58) | 0.8081 | 0.9464 |
| Interaction | 0.7 (0.22, 2.27) | 0.5528 | 0.8043 |
| *SFRP1* | AI-initiated | 0.95 (0.49, 1.83) | 0.8685 | 0.9700 |
| SERM-initiated | 0.71 (0.3, 1.66) | 0.4285 | 0.7524 |
| Interaction | 0.75 (0.29, 1.95) | 0.5530 | 0.8043 |
| *MYC* | AI-initiated | 0.69 (0.32, 1.48) | 0.3365 | 0.7094 |
| SERM-initiated | 0.9 (0.46, 1.77) | 0.7668 | 0.9260 |
| Interaction | 1.31 (0.51, 3.37) | 0.5720 | 0.8227 |
| *IFT140* | AI-initiated | 0.73 (0.43, 1.27) | 0.2672 | 0.6563 |
| SERM-initiated | 1.03 (0.39, 2.75) | 0.9509 | 0.9887 |
| Interaction | 1.4 (0.41, 4.78) | 0.5876 | 0.8326 |
| *PTTG1* | AI-initiated | 1.33 (0.52, 3.4) | 0.5550 | 0.8043 |
| SERM-initiated | 1.86 (0.78, 4.45) | 0.1632 | 0.5179 |
| Interaction | 1.4 (0.39, 5.06) | 0.6060 | 0.8446 |
| *NAT1* | AI-initiated | 1.15 (0.79, 1.68) | 0.4689 | 0.7680 |
| SERM-initiated | 0.85 (0.27, 2.62) | 0.7741 | 0.9260 |
| Interaction | 0.74 (0.23, 2.4) | 0.6115 | 0.8446 |
| *GPR160* | AI-initiated | 1.64 (0.85, 3.16) | 0.1399 | 0.4796 |
| SERM-initiated | 1.07 (0.29, 4.04) | 0.9161 | 0.9857 |
| Interaction | 0.65 (0.13, 3.36) | 0.6123 | 0.8446 |
| *WNT5B* | AI-initiated | 1.03 (0.5, 2.09) | 0.9425 | 0.9887 |
| SERM-initiated | 1.33 (0.62, 2.84) | 0.4691 | 0.7680 |
| Interaction | 1.29 (0.47, 3.54) | 0.6195 | 0.8446 |
| *PIK3CA* | AI-initiated | 0.83 (0.47, 1.49) | 0.5431 | 0.7997 |
| SERM-initiated | 1.04 (0.54, 2.01) | 0.9100 | 0.9844 |
| Interaction | 1.24 (0.52, 2.98) | 0.6236 | 0.8446 |
| *GSK3B* | AI-initiated | 0.88 (0.51, 1.5) | 0.6319 | 0.8446 |
| SERM-initiated | 1.08 (0.5, 2.36) | 0.8467 | 0.9647 |
| Interaction | 1.23 (0.53, 2.85) | 0.6272 | 0.8446 |
| *CRYBB2* | AI-initiated | 1.01 (0.74, 1.37) | 0.9588 | 0.9924 |
| SERM-initiated | 0.73 (0.2, 2.65) | 0.6373 | 0.8446 |
| Interaction | 0.73 (0.2, 2.66) | 0.6321 | 0.8446 |
| *MUC1* | AI-initiated | 1.53 (0.93, 2.52) | 0.0962 | 0.3952 |
| SERM-initiated | 2.07 (0.65, 6.57) | 0.2169 | 0.5991 |
| Interaction | 1.35 (0.38, 4.86) | 0.6414 | 0.8446 |
| *CD44* | AI-initiated | 0.75 (0.36, 1.58) | 0.4545 | 0.7680 |
| SERM-initiated | 1.13 (0.25, 5.14) | 0.8728 | 0.9700 |
| Interaction | 1.5 (0.27, 8.41) | 0.6449 | 0.8446 |
| *SFRP2* | AI-initiated | 0.75 (0.36, 1.58) | 0.4503 | 0.7680 |
| SERM-initiated | 0.63 (0.31, 1.29) | 0.2052 | 0.5838 |
| Interaction | 0.84 (0.39, 1.8) | 0.6489 | 0.8446 |
| *CD29* | AI-initiated | 1.22 (0.67, 2.19) | 0.5159 | 0.7857 |
| SERM-initiated | 1 (0.53, 1.9) | 0.9935 | 0.9987 |
| Interaction | 0.82 (0.32, 2.13) | 0.6905 | 0.8713 |
| *BCL2* | AI-initiated | 0.7 (0.35, 1.41) | 0.3167 | 0.7094 |
| SERM-initiated | 0.86 (0.38, 1.97) | 0.7277 | 0.8998 |
| Interaction | 1.24 (0.39, 3.94) | 0.7204 | 0.8981 |
| *CD27* | AI-initiated | 0.87 (0.49, 1.54) | 0.6224 | 0.8446 |
| SERM-initiated | 0.73 (0.35, 1.52) | 0.4027 | 0.7524 |
| Interaction | 0.85 (0.34, 2.12) | 0.7231 | 0.8986 |
| *MLPH* | AI-initiated | 0.99 (0.58, 1.71) | 0.9838 | 0.9987 |
| SERM-initiated | 0.81 (0.24, 2.7) | 0.7311 | 0.8998 |
| Interaction | 0.81 (0.19, 3.53) | 0.7831 | 0.9310 |
| *TWIST2* | AI-initiated | 0.78 (0.37, 1.64) | 0.5131 | 0.7857 |
| SERM-initiated | 0.71 (0.34, 1.46) | 0.3503 | 0.7094 |
| Interaction | 0.9 (0.4, 2.04) | 0.8085 | 0.9464 |
| *LEF1* | AI-initiated | 1.19 (0.84, 1.69) | 0.3358 | 0.7094 |
| SERM-initiated | 1.33 (0.54, 3.28) | 0.5366 | 0.7987 |
| Interaction | 1.12 (0.45, 2.78) | 0.8108 | 0.9464 |
| *SLC39A6* | AI-initiated | 0.78 (0.32, 1.93) | 0.5927 | 0.8367 |
| SERM-initiated | 0.7 (0.39, 1.25) | 0.2299 | 0.6095 |
| Interaction | 0.9 (0.3, 2.68) | 0.8462 | 0.9647 |
| *WDR77* | AI-initiated | 1.11 (0.71, 1.72) | 0.6476 | 0.8446 |
| SERM-initiated | 1.26 (0.34, 4.6) | 0.7297 | 0.8998 |
| Interaction | 1.13 (0.29, 4.39) | 0.8546 | 0.9647 |
| *PHGDH* | AI-initiated | 1.13 (0.78, 1.64) | 0.5065 | 0.7857 |
| SERM-initiated | 1.25 (0.49, 3.19) | 0.6441 | 0.8446 |
| Interaction | 1.1 (0.39, 3.07) | 0.8548 | 0.9647 |
| *BORCS7* | AI-initiated | 1 (0.6, 1.66) | 0.9962 | 0.9988 |
| SERM-initiated | 1.1 (0.32, 3.73) | 0.8791 | 0.9700 |
| Interaction | 1.1 (0.33, 3.71) | 0.8770 | 0.9700 |
| *BCL2L1* | AI-initiated | 1.34 (0.74, 2.43) | 0.3404 | 0.7094 |
| SERM-initiated | 1.26 (0.64, 2.47) | 0.5099 | 0.7857 |
| Interaction | 0.94 (0.37, 2.35) | 0.8917 | 0.9715 |
| *EGF* | AI-initiated | 0.83 (0.46, 1.52) | 0.5500 | 0.8043 |
| SERM-initiated | 0.86 (0.41, 1.84) | 0.7045 | 0.8812 |
| Interaction | 1.04 (0.4, 2.7) | 0.9405 | 0.9887 |
| *FGFR4* | AI-initiated | 0.79 (0.48, 1.31) | 0.3637 | 0.7236 |
| SERM-initiated | 0.73 (0.09, 6.06) | 0.7739 | 0.9260 |
| Interaction | 0.93 (0.11, 7.97) | 0.9439 | 0.9887 |
| *GPC4* | AI-initiated | 1.75 (1.15, 2.67) | 0.0085 | 0.1169 |
| SERM-initiated | 1.7 (0.62, 4.67) | 0.3070 | 0.6982 |
| Interaction | 0.97 (0.33, 2.85) | 0.9512 | 0.9887 |
| *ZEB1* | AI-initiated | 0.88 (0.39, 2.01) | 0.7681 | 0.9260 |
| SERM-initiated | 0.87 (0.44, 1.7) | 0.6852 | 0.8683 |
| Interaction | 0.98 (0.45, 2.16) | 0.9697 | 0.9975 |
| *ITGB6* | AI-initiated | 1.59 (0.59, 4.3) | 0.3607 | 0.7215 |
| SERM-initiated | 1.61 (1.19, 2.18) | 0.0018 | 0.0363 |
| Interaction | 1.01 (0.35, 2.96) | 0.9792 | 0.9987 |
| *ESR1* | AI-initiated | 1.14 (0.68, 1.91) | 0.6100 | 0.8446 |
| SERM-initiated | 1.16 (0.13, 10.05) | 0.8928 | 0.9715 |
| Interaction | 1.01 (0.14, 7.43) | 0.9884 | 0.9987 |
| *SQLE* | AI-initiated | 0.87 (0.58, 1.31) | 0.5015 | 0.7857 |
| SERM-initiated | 0.87 (0.28, 2.74) | 0.8184 | 0.9523 |
| Interaction | 1.01 (0.33, 3.09) | 0.9915 | 0.9987 |

**Table S2.** Unadjusted associations between clinical characteristics and study outcomes from bivariate Cox proportional hazards models

| **Characteristics** | **Hazard ratio (95% CI) from bivariate Cox Proportional hazard model** | | | |
| --- | --- | --- | --- | --- |
| **Time-to-recurrence outcome** | | **Time-to-switch outcome** | |
| Estimate | P value | Estimate | P value |
| **Menstrual at diagnosis** | | | | |
| Premenopausal | 1 | - | 1 | - |
| Postmenopausal | 1.02 (0.43, 2.43) | 0.965 | 0.92 (0.51, 1.67) | 0.795 |
| **Diabetes at diagnosis** | | | | |
| No | 1 | - | 1 | - |
| Yes | 0.66 (0.15, 2.84) | 0.579 | 0.63 (0.23, 1.76) | 0.382 |
| **Histology** | | | | |
| IDC | 1 | - | 1 | - |
| Non-ductal (ILC/other) | 1.18 (0.46, 3.02) | 0.727 | 2.31 (1.29, 4.13) | 0.005 |
| **Tumor grade** | | | | |
| I | 1 | - | 1 | - |
| II | 0.45 (0.10, 1.96) | 0.288 | 0.29 (0.12, 0.70) | 0.006 |
| III | 0.47 (0.08, 2.83) | 0.413 | 0.28 (0.09, 0.86) | 0.027 |
| **Cancer stage** | | | | |
| I/II | 1 | - | 1 | - |
| III | 1.22 (0.50, 3.00) | 0.661 | 1.49 (0.82, 2.72) | 0.189 |
| **Age at diagnosis** | 1.02 (0.98, 1.05) | 0.309 | 1.01 (0.99, 1.04) | 0.335 |
| **Body mass index at diagnosis** | 1.00 (0.93, 1.08) | 0.951 | 1.02 (0.97, 1.07) | 0.514 |
| **Tumor size (cm)** | 1.06 (0.84, 1.35) | 0.616 | 0.99 (0.83, 1.19) | 0.953 |

**Table S3.** Unadjusted Cox proportional hazards models for time-to-recurrence with interaction between baseline gene expression and initial endocrine therapy

| **Gene** | **Initial endocrine therapy type** | **Hazard ratio (95% CI)** | **P value (raw)** | **P value (adjusted)** |
| --- | --- | --- | --- | --- |
| *TP53* | AI-initiated | 0.76 (0.52, 1.1) | 0.1475 | 0.5560 |
| SERM-initiated | 3.41 (1.54, 7.54) | 0.0025 | 0.0641 |
| Interaction | 4.49 (1.88, 10.77) | 0.0008 | 0.0289 |
| *WNT7B* | AI-initiated | 1.14 (0.81, 1.6) | 0.4424 | 0.7647 |
| SERM-initiated | 4.47 (2.26, 8.85) | 0.0000 | 0.0013 |
| Interaction | 3.92 (1.91, 8.04) | 0.0002 | 0.0110 |
| *UBE2T* | AI-initiated | 0.95 (0.63, 1.42) | 0.8043 | 0.9417 |
| SERM-initiated | 3.8 (2.2, 6.56) | 0.0000 | 0.0003 |
| Interaction | 4 (1.87, 8.56) | 0.0004 | 0.0150 |
| *BAG1* | AI-initiated | 0.9 (0.62, 1.29) | 0.5530 | 0.8360 |
| SERM-initiated | 2.82 (1.31, 6.09) | 0.0083 | 0.1276 |
| Interaction | 3.15 (1.32, 7.52) | 0.0100 | 0.1434 |
| *ACTR3B* | AI-initiated | 0.57 (0.25, 1.31) | 0.1885 | 0.6070 |
| SERM-initiated | 1.86 (1.25, 2.76) | 0.0021 | 0.0628 |
| Interaction | 3.24 (1.31, 8) | 0.0109 | 0.1434 |
| *PIK3R5* | AI-initiated | 1.63 (0.99, 2.69) | 0.0541 | 0.3709 |
| SERM-initiated | 0.68 (0.36, 1.27) | 0.2253 | 0.6472 |
| Interaction | 0.42 (0.19, 0.93) | 0.0319 | 0.2924 |
| *MELK* | AI-initiated | 0.94 (0.53, 1.65) | 0.8202 | 0.9449 |
| SERM-initiated | 2.02 (1.23, 3.33) | 0.0056 | 0.0986 |
| Interaction | 2.16 (1, 4.68) | 0.0513 | 0.3646 |
| *CCND1* | AI-initiated | 0.04 (0, 0.48) | 0.0109 | 0.1434 |
| SERM-initiated | 1.41 (1.19, 1.67) | 0.0001 | 0.0048 |
| Interaction | 33.23 (2.92, 378.36) | 0.0048 | 0.0876 |
| *MMP11* | AI-initiated | 0.42 (0.14, 1.29) | 0.1303 | 0.5212 |
| SERM-initiated | 2.33 (1.06, 5.12) | 0.0362 | 0.3021 |
| Interaction | 5.48 (1.4, 21.38) | 0.0144 | 0.1677 |
| *MAPT* | AI-initiated | 0.74 (0.39, 1.41) | 0.3564 | 0.7320 |
| SERM-initiated | 1.78 (0.87, 3.67) | 0.1158 | 0.4887 |
| Interaction | 2.42 (0.91, 6.44) | 0.0771 | 0.4355 |
| *KRT17* | AI-initiated | 0.57 (0.28, 1.18) | 0.1293 | 0.5212 |
| SERM-initiated | 1.35 (0.89, 2.05) | 0.1564 | 0.5600 |
| Interaction | 2.36 (1.03, 5.41) | 0.0433 | 0.3327 |
| *FOXA1* | AI-initiated | 1.01 (0.67, 1.52) | 0.9750 | 0.9931 |
| SERM-initiated | 3.13 (1.38, 7.12) | 0.0065 | 0.1091 |
| Interaction | 3.11 (1.24, 7.76) | 0.0151 | 0.1711 |
| *BRCA1* | AI-initiated | 0.64 (0.29, 1.42) | 0.2702 | 0.7049 |
| SERM-initiated | 1.95 (0.86, 4.41) | 0.1076 | 0.4887 |
| Interaction | 3.06 (0.96, 9.74) | 0.0581 | 0.3889 |
| *IGF1* | AI-initiated | 1.35 (0.72, 2.53) | 0.3490 | 0.7320 |
| SERM-initiated | 0.58 (0.22, 1.55) | 0.2768 | 0.7049 |
| Interaction | 0.43 (0.13, 1.38) | 0.1560 | 0.5600 |
| *CDC6* | AI-initiated | 0.9 (0.55, 1.45) | 0.6580 | 0.8692 |
| SERM-initiated | 1.93 (0.9, 4.13) | 0.0906 | 0.4702 |
| Interaction | 2.15 (0.87, 5.32) | 0.0973 | 0.4846 |
| *ITPR1* | AI-initiated | 1.23 (1.07, 1.42) | 0.0038 | 0.0765 |
| SERM-initiated | 0.45 (0.13, 1.56) | 0.2083 | 0.6445 |
| Interaction | 0.37 (0.11, 1.28) | 0.1154 | 0.4887 |
| *UBE2C* | AI-initiated | 1.11 (0.74, 1.68) | 0.6115 | 0.8611 |
| SERM-initiated | 2.16 (1.22, 3.82) | 0.0081 | 0.1276 |
| Interaction | 1.94 (0.95, 3.96) | 0.0679 | 0.4139 |
| *MKI67* | AI-initiated | 1.02 (0.59, 1.79) | 0.9377 | 0.9843 |
| SERM-initiated | 2.01 (1.3, 3.1) | 0.0016 | 0.0500 |
| Interaction | 1.97 (0.96, 4.03) | 0.0648 | 0.4015 |
| *CDCA1* | AI-initiated | 1.04 (0.72, 1.5) | 0.8254 | 0.9449 |
| SERM-initiated | 1.75 (1.29, 2.37) | 0.0003 | 0.0139 |
| Interaction | 1.68 (1.05, 2.69) | 0.0317 | 0.2924 |
| *MYBL2* | AI-initiated | 0.69 (0.42, 1.15) | 0.1570 | 0.5600 |
| SERM-initiated | 1.65 (0.81, 3.37) | 0.1665 | 0.5760 |
| Interaction | 2.39 (0.99, 5.75) | 0.0527 | 0.3678 |
| *PSPHL* | AI-initiated | 0.8 (0.37, 1.71) | 0.5596 | 0.8361 |
| SERM-initiated | 1.71 (1.18, 2.47) | 0.0048 | 0.0876 |
| Interaction | 2.14 (0.92, 4.98) | 0.0770 | 0.4355 |
| *TP63* | AI-initiated | 0.77 (0.48, 1.24) | 0.2849 | 0.7049 |
| SERM-initiated | 4.41 (0.91, 21.25) | 0.0646 | 0.4015 |
| Interaction | 5.72 (1.1, 29.69) | 0.0378 | 0.3025 |
| *ANLN* | AI-initiated | 1.01 (0.59, 1.72) | 0.9816 | 0.9937 |
| SERM-initiated | 2.11 (1.27, 3.48) | 0.0037 | 0.0765 |
| Interaction | 2.09 (1, 4.38) | 0.0496 | 0.3595 |
| *MTOR* | AI-initiated | 0.63 (0.41, 0.98) | 0.0417 | 0.3270 |
| SERM-initiated | 1.24 (0.61, 2.54) | 0.5498 | 0.8345 |
| Interaction | 1.96 (0.85, 4.52) | 0.1151 | 0.4887 |
| *KRT14* | AI-initiated | 0.86 (0.62, 1.19) | 0.3669 | 0.7320 |
| SERM-initiated | 5.5 (0.82, 36.87) | 0.0789 | 0.4389 |
| Interaction | 6.39 (0.93, 43.98) | 0.0597 | 0.3889 |
| *CEP55* | AI-initiated | 1.06 (0.69, 1.64) | 0.7796 | 0.9355 |
| SERM-initiated | 2.05 (1.06, 3.98) | 0.0327 | 0.2924 |
| Interaction | 1.93 (0.87, 4.27) | 0.1044 | 0.4887 |
| *WNT11* | AI-initiated | 2.3 (1.01, 5.24) | 0.0464 | 0.3467 |
| SERM-initiated | 1.39 (1.2, 1.61) | 0.0000 | 0.0010 |
| Interaction | 0.6 (0.27, 1.34) | 0.2149 | 0.6447 |
| *PIK3R2* | AI-initiated | 0.83 (0.54, 1.27) | 0.3866 | 0.7354 |
| SERM-initiated | 2.22 (1.08, 4.57) | 0.0297 | 0.2924 |
| Interaction | 2.69 (1.16, 6.22) | 0.0211 | 0.2248 |
| *CDCA8* | AI-initiated | 0.91 (0.56, 1.48) | 0.7029 | 0.8885 |
| SERM-initiated | 1.82 (0.95, 3.49) | 0.0712 | 0.4207 |
| Interaction | 2 (0.88, 4.52) | 0.0962 | 0.4846 |
| *ORC6L* | AI-initiated | 0.76 (0.42, 1.38) | 0.3753 | 0.7354 |
| SERM-initiated | 1.68 (1.12, 2.5) | 0.0112 | 0.1434 |
| Interaction | 2.19 (1.07, 4.5) | 0.0324 | 0.2924 |
| *GRB7* | AI-initiated | 0.71 (0.33, 1.51) | 0.3759 | 0.7354 |
| SERM-initiated | 1.71 (1.03, 2.83) | 0.0372 | 0.3025 |
| Interaction | 2.4 (0.96, 6) | 0.0606 | 0.3889 |
| *KIF2C* | AI-initiated | 0.79 (0.44, 1.42) | 0.4246 | 0.7513 |
| SERM-initiated | 1.62 (0.92, 2.87) | 0.0948 | 0.4846 |
| Interaction | 2.07 (0.89, 4.77) | 0.0896 | 0.4702 |
| *TMEM45B* | AI-initiated | 1.62 (0.98, 2.69) | 0.0608 | 0.3889 |
| SERM-initiated | 1.15 (0.77, 1.7) | 0.4935 | 0.7895 |
| Interaction | 0.71 (0.37, 1.34) | 0.2854 | 0.7049 |
| *CENPF* | AI-initiated | 1.2 (0.78, 1.83) | 0.4065 | 0.7364 |
| SERM-initiated | 2.13 (1.18, 3.83) | 0.0117 | 0.1447 |
| Interaction | 1.78 (0.85, 3.73) | 0.1281 | 0.5212 |
| *RRM2* | AI-initiated | 1.02 (0.68, 1.55) | 0.9105 | 0.9843 |
| SERM-initiated | 1.84 (0.92, 3.66) | 0.0833 | 0.4511 |
| Interaction | 1.79 (0.8, 4.03) | 0.1576 | 0.5600 |
| *CD8A* | AI-initiated | 1.2 (0.8, 1.79) | 0.3807 | 0.7354 |
| SERM-initiated | 0.62 (0.31, 1.24) | 0.1750 | 0.5902 |
| Interaction | 0.52 (0.23, 1.16) | 0.1074 | 0.4887 |
| *APOE* | AI-initiated | 1.12 (0.64, 1.97) | 0.6800 | 0.8792 |
| SERM-initiated | 0.58 (0.26, 1.27) | 0.1717 | 0.5887 |
| Interaction | 0.51 (0.19, 1.35) | 0.1776 | 0.5902 |
| *CXXC5* | AI-initiated | 0.75 (0.41, 1.34) | 0.3280 | 0.7320 |
| SERM-initiated | 1.06 (0.67, 1.69) | 0.7973 | 0.9392 |
| Interaction | 1.42 (0.67, 3.01) | 0.3543 | 0.7320 |
| *HMGA2* | AI-initiated | 0.84 (0.4, 1.77) | 0.6517 | 0.8671 |
| SERM-initiated | 1.52 (0.87, 2.67) | 0.1428 | 0.5560 |
| Interaction | 1.81 (0.71, 4.57) | 0.2126 | 0.6445 |
| *CDH3* | AI-initiated | 0.7 (0.33, 1.51) | 0.3679 | 0.7320 |
| SERM-initiated | 1.34 (0.84, 2.13) | 0.2192 | 0.6472 |
| Interaction | 1.9 (0.77, 4.68) | 0.1626 | 0.5675 |
| *FGFR3* | AI-initiated | 0.61 (0.34, 1.07) | 0.0865 | 0.4611 |
| SERM-initiated | 1.18 (0.59, 2.36) | 0.6355 | 0.8611 |
| Interaction | 1.95 (0.79, 4.8) | 0.1453 | 0.5560 |
| *TOP2A* | AI-initiated | 0.98 (0.55, 1.76) | 0.9570 | 0.9886 |
| SERM-initiated | 1.75 (1.04, 2.94) | 0.0341 | 0.2934 |
| Interaction | 1.78 (0.8, 3.95) | 0.1555 | 0.5600 |
| *WNT5A* | AI-initiated | 0.5 (0.27, 0.94) | 0.0312 | 0.2924 |
| SERM-initiated | 1.56 (0.76, 3.19) | 0.2259 | 0.6472 |
| Interaction | 3.11 (1.2, 8.08) | 0.0195 | 0.2138 |
| *BIRC5* | AI-initiated | 0.76 (0.44, 1.33) | 0.3416 | 0.7320 |
| SERM-initiated | 1.36 (0.76, 2.43) | 0.2968 | 0.7179 |
| Interaction | 1.78 (0.8, 3.97) | 0.1589 | 0.5600 |
| *TFF1* | AI-initiated | 1.05 (0.69, 1.6) | 0.8292 | 0.9449 |
| SERM-initiated | 1.39 (1.15, 1.69) | 0.0009 | 0.0305 |
| Interaction | 1.33 (0.84, 2.11) | 0.2292 | 0.6472 |
| *KNTC2* | AI-initiated | 0.9 (0.56, 1.45) | 0.6623 | 0.8692 |
| SERM-initiated | 1.87 (0.92, 3.79) | 0.0834 | 0.4511 |
| Interaction | 2.08 (0.87, 4.95) | 0.0984 | 0.4846 |
| *SYTL4* | AI-initiated | 0.32 (0.13, 0.79) | 0.0135 | 0.1619 |
| SERM-initiated | 1 (0.58, 1.73) | 0.9859 | 0.9937 |
| Interaction | 3.1 (1.09, 8.82) | 0.0344 | 0.2934 |
| *MIA* | AI-initiated | 0.88 (0.45, 1.73) | 0.7150 | 0.8885 |
| SERM-initiated | 1.6 (0.9, 2.88) | 0.1121 | 0.4887 |
| Interaction | 1.82 (0.75, 4.42) | 0.1864 | 0.6070 |
| *VRD* | AI-initiated | 1.13 (0.87, 1.47) | 0.3564 | 0.7320 |
| SERM-initiated | 3.32 (0.36, 30.49) | 0.2882 | 0.7049 |
| Interaction | 2.94 (0.32, 26.95) | 0.3410 | 0.7320 |
| *CDC20* | AI-initiated | 0.77 (0.48, 1.23) | 0.2778 | 0.7049 |
| SERM-initiated | 1.37 (0.83, 2.28) | 0.2204 | 0.6472 |
| Interaction | 1.78 (0.89, 3.57) | 0.1020 | 0.4887 |
| *CCNE1* | AI-initiated | 0.95 (0.62, 1.44) | 0.7953 | 0.9392 |
| SERM-initiated | 1.21 (0.68, 2.15) | 0.5166 | 0.8064 |
| Interaction | 1.28 (0.63, 2.6) | 0.4980 | 0.7933 |
| *EZH2* | AI-initiated | 1.22 (0.66, 2.26) | 0.5243 | 0.8119 |
| SERM-initiated | 1.67 (1.05, 2.67) | 0.0304 | 0.2924 |
| Interaction | 1.37 (0.63, 2.98) | 0.4265 | 0.7513 |
| *PRKCA* | AI-initiated | 1.03 (0.57, 1.85) | 0.9280 | 0.9843 |
| SERM-initiated | 0.66 (0.39, 1.12) | 0.1222 | 0.5101 |
| Interaction | 0.65 (0.29, 1.42) | 0.2762 | 0.7049 |
| *CCNB1* | AI-initiated | 1.2 (0.66, 2.18) | 0.5408 | 0.8274 |
| SERM-initiated | 1.67 (0.89, 3.13) | 0.1098 | 0.4887 |
| Interaction | 1.39 (0.58, 3.33) | 0.4631 | 0.7743 |
| *MDM2* | AI-initiated | 0.83 (0.53, 1.31) | 0.4211 | 0.7489 |
| SERM-initiated | 0.26 (0.07, 0.98) | 0.0470 | 0.3467 |
| Interaction | 0.31 (0.08, 1.28) | 0.1056 | 0.4887 |
| *PIK3R1* | AI-initiated | 0.95 (0.48, 1.88) | 0.8824 | 0.9744 |
| SERM-initiated | 0.48 (0.12, 1.91) | 0.3001 | 0.7179 |
| Interaction | 0.51 (0.11, 2.35) | 0.3877 | 0.7354 |
| *CD49* | AI-initiated | 1.18 (0.73, 1.9) | 0.4999 | 0.7933 |
| SERM-initiated | 0.71 (0.38, 1.33) | 0.2871 | 0.7049 |
| Interaction | 0.6 (0.27, 1.33) | 0.2105 | 0.6445 |
| *WNT4* | AI-initiated | 0.65 (0.32, 1.31) | 0.2277 | 0.6472 |
| SERM-initiated | 1.08 (0.66, 1.75) | 0.7653 | 0.9217 |
| Interaction | 1.65 (0.71, 3.86) | 0.2451 | 0.6674 |
| *ALDH1A1* | AI-initiated | 1.03 (0.67, 1.61) | 0.8808 | 0.9744 |
| SERM-initiated | 0.68 (0.25, 1.84) | 0.4455 | 0.7647 |
| Interaction | 0.65 (0.22, 1.96) | 0.4481 | 0.7647 |
| *WNT10A* | AI-initiated | 0.7 (0.35, 1.39) | 0.3048 | 0.7179 |
| SERM-initiated | 1.37 (0.56, 3.33) | 0.4926 | 0.7895 |
| Interaction | 1.95 (0.64, 6.01) | 0.2424 | 0.6674 |
| *ZEB2* | AI-initiated | 1.22 (0.65, 2.27) | 0.5361 | 0.8235 |
| SERM-initiated | 0.79 (0.46, 1.36) | 0.3959 | 0.7364 |
| Interaction | 0.65 (0.29, 1.48) | 0.3066 | 0.7179 |
| *WNT6* | AI-initiated | 1.23 (0.69, 2.19) | 0.4862 | 0.7895 |
| SERM-initiated | 1.55 (1.16, 2.07) | 0.0030 | 0.0690 |
| Interaction | 1.26 (0.68, 2.36) | 0.4639 | 0.7743 |
| *TYMS* | AI-initiated | 1 (0.6, 1.66) | 0.9911 | 0.9963 |
| SERM-initiated | 1.58 (0.81, 3.07) | 0.1756 | 0.5902 |
| Interaction | 1.59 (0.68, 3.68) | 0.2829 | 0.7049 |
| *KRT5* | AI-initiated | 0.88 (0.66, 1.17) | 0.3814 | 0.7354 |
| SERM-initiated | 2.92 (0.42, 20.41) | 0.2797 | 0.7049 |
| Interaction | 3.31 (0.46, 23.63) | 0.2319 | 0.6499 |
| *EXO1* | AI-initiated | 1 (0.67, 1.49) | 0.9859 | 0.9937 |
| SERM-initiated | 1.49 (0.7, 3.19) | 0.3031 | 0.7179 |
| Interaction | 1.49 (0.63, 3.5) | 0.3660 | 0.7320 |
| *PIK3CD* | AI-initiated | 1.26 (0.81, 1.97) | 0.3051 | 0.7179 |
| SERM-initiated | 0.87 (0.51, 1.51) | 0.6263 | 0.8611 |
| Interaction | 0.69 (0.34, 1.4) | 0.3060 | 0.7179 |
| *SP110* | AI-initiated | 1.31 (0.77, 2.23) | 0.3129 | 0.7281 |
| SERM-initiated | 0.8 (0.47, 1.36) | 0.4044 | 0.7364 |
| Interaction | 0.61 (0.29, 1.29) | 0.1929 | 0.6070 |
| *PIK3R3* | AI-initiated | 1.17 (0.8, 1.72) | 0.4213 | 0.7489 |
| SERM-initiated | 0.89 (0.47, 1.67) | 0.7109 | 0.8885 |
| Interaction | 0.76 (0.36, 1.59) | 0.4622 | 0.7743 |
| *FOXC1* | AI-initiated | 0.9 (0.59, 1.38) | 0.6265 | 0.8611 |
| SERM-initiated | 0.6 (0.29, 1.26) | 0.1783 | 0.5902 |
| Interaction | 0.67 (0.28, 1.57) | 0.3551 | 0.7320 |
| *PLCB1* | AI-initiated | 1.44 (1.13, 1.83) | 0.0031 | 0.0690 |
| SERM-initiated | 1.72 (0.68, 4.34) | 0.2499 | 0.6750 |
| Interaction | 1.2 (0.47, 3.08) | 0.7073 | 0.8885 |
| *CCND2* | AI-initiated | 1.02 (0.61, 1.7) | 0.9344 | 0.9843 |
| SERM-initiated | 0.79 (0.53, 1.2) | 0.2720 | 0.7049 |
| Interaction | 0.78 (0.4, 1.5) | 0.4520 | 0.7679 |
| *TWIST1* | AI-initiated | 0.88 (0.46, 1.66) | 0.6858 | 0.8814 |
| SERM-initiated | 0.84 (0.54, 1.31) | 0.4450 | 0.7647 |
| Interaction | 0.96 (0.44, 2.08) | 0.9197 | 0.9843 |
| *AKT3* | AI-initiated | 0.99 (0.54, 1.83) | 0.9813 | 0.9937 |
| SERM-initiated | 1.84 (1.15, 2.94) | 0.0107 | 0.1434 |
| Interaction | 1.85 (0.84, 4.09) | 0.1265 | 0.5212 |
| *PGR* | AI-initiated | 0.2 (0.02, 1.87) | 0.1570 | 0.5600 |
| SERM-initiated | 0.88 (0.54, 1.42) | 0.5951 | 0.8591 |
| Interaction | 4.44 (0.45, 44.11) | 0.2029 | 0.6334 |
| *THY1* | AI-initiated | 1.02 (0.56, 1.87) | 0.9484 | 0.9843 |
| SERM-initiated | 0.95 (0.7, 1.29) | 0.7261 | 0.8994 |
| Interaction | 0.93 (0.47, 1.83) | 0.8287 | 0.9449 |
| *CREBBP* | AI-initiated | 1.36 (0.73, 2.54) | 0.3316 | 0.7320 |
| SERM-initiated | 1.24 (0.75, 2.06) | 0.4091 | 0.7375 |
| Interaction | 0.91 (0.41, 2.03) | 0.8168 | 0.9449 |
| *VIM* | AI-initiated | 0.98 (0.49, 1.94) | 0.9474 | 0.9843 |
| SERM-initiated | 0.8 (0.57, 1.12) | 0.1914 | 0.6070 |
| Interaction | 0.82 (0.38, 1.76) | 0.6064 | 0.8611 |
| *MAPK10* | AI-initiated | 1.26 (0.89, 1.79) | 0.1898 | 0.6070 |
| SERM-initiated | 2.18 (0.35, 13.71) | 0.4062 | 0.7364 |
| Interaction | 1.73 (0.27, 11.13) | 0.5655 | 0.8385 |
| *STAT1* | AI-initiated | 1.07 (0.68, 1.69) | 0.7657 | 0.9217 |
| SERM-initiated | 0.7 (0.32, 1.53) | 0.3662 | 0.7320 |
| Interaction | 0.65 (0.26, 1.61) | 0.3524 | 0.7320 |
| *CLDN4 (claudin-4)* | AI-initiated | 1.33 (0.93, 1.9) | 0.1127 | 0.4887 |
| SERM-initiated | 1.6 (0.85, 3.01) | 0.1473 | 0.5560 |
| Interaction | 1.2 (0.58, 2.48) | 0.6217 | 0.8611 |
| *HGF* | AI-initiated | 1.09 (0.7, 1.7) | 0.7086 | 0.8885 |
| SERM-initiated | 0.82 (0.49, 1.36) | 0.4366 | 0.7620 |
| Interaction | 0.75 (0.38, 1.48) | 0.4055 | 0.7364 |
| *CLDN7 (claudin-7)* | AI-initiated | 0.98 (0.65, 1.5) | 0.9408 | 0.9843 |
| SERM-initiated | 1.36 (0.84, 2.2) | 0.2132 | 0.6445 |
| Interaction | 1.38 (0.73, 2.61) | 0.3248 | 0.7320 |
| *CD10* | AI-initiated | 0.82 (0.37, 1.83) | 0.6353 | 0.8611 |
| SERM-initiated | 0.74 (0.44, 1.26) | 0.2733 | 0.7049 |
| Interaction | 0.9 (0.35, 2.36) | 0.8355 | 0.9492 |
| *IGF1R* | AI-initiated | 1.16 (1.08, 1.24) | 0.0000 | 0.0012 |
| SERM-initiated | 0.16 (0, 8.32) | 0.3642 | 0.7320 |
| Interaction | 0.14 (0, 7.19) | 0.3271 | 0.7320 |
| *EGFR* | AI-initiated | 0.91 (0.4, 2.07) | 0.8149 | 0.9449 |
| SERM-initiated | 0.68 (0.3, 1.53) | 0.3489 | 0.7320 |
| Interaction | 0.75 (0.23, 2.38) | 0.6226 | 0.8611 |
| *EpCAM* | AI-initiated | 1.44 (0.89, 2.35) | 0.1401 | 0.5545 |
| SERM-initiated | 0.9 (0.55, 1.49) | 0.6886 | 0.8814 |
| Interaction | 0.63 (0.31, 1.26) | 0.1873 | 0.6070 |
| *WNT2* | AI-initiated | 0.75 (0.4, 1.4) | 0.3619 | 0.7320 |
| SERM-initiated | 1.26 (0.64, 2.5) | 0.5023 | 0.7938 |
| Interaction | 1.69 (0.67, 4.29) | 0.2672 | 0.7049 |
| *SNAI2* | AI-initiated | 0.76 (0.41, 1.43) | 0.3996 | 0.7364 |
| SERM-initiated | 0.74 (0.38, 1.45) | 0.3774 | 0.7354 |
| Interaction | 0.97 (0.38, 2.42) | 0.9404 | 0.9843 |
| *PIK3CG* | AI-initiated | 0.98 (0.61, 1.58) | 0.9398 | 0.9843 |
| SERM-initiated | 0.8 (0.43, 1.48) | 0.4827 | 0.7895 |
| Interaction | 0.82 (0.37, 1.79) | 0.6125 | 0.8611 |
| *CK8/18* | AI-initiated | 0.94 (0.67, 1.34) | 0.7475 | 0.9113 |
| SERM-initiated | 1.13 (0.67, 1.91) | 0.6456 | 0.8669 |
| Interaction | 1.2 (0.64, 2.25) | 0.5748 | 0.8457 |
| *PTEN* | AI-initiated | 0.96 (0.59, 1.58) | 0.8781 | 0.9744 |
| SERM-initiated | 0.88 (0.49, 1.58) | 0.6645 | 0.8692 |
| Interaction | 0.91 (0.42, 1.97) | 0.8165 | 0.9449 |
| *ERBB2* | AI-initiated | 0.77 (0.44, 1.35) | 0.3665 | 0.7320 |
| SERM-initiated | 1.14 (0.66, 2) | 0.6362 | 0.8611 |
| Interaction | 1.48 (0.67, 3.25) | 0.3312 | 0.7320 |
| *CD24* | AI-initiated | 1.31 (0.83, 2.05) | 0.2436 | 0.6674 |
| SERM-initiated | 1.01 (0.67, 1.52) | 0.9663 | 0.9895 |
| Interaction | 0.77 (0.42, 1.42) | 0.4053 | 0.7364 |
| *CDH1* | AI-initiated | 0.86 (0.47, 1.57) | 0.6223 | 0.8611 |
| SERM-initiated | 1.14 (0.64, 2.04) | 0.6526 | 0.8671 |
| Interaction | 1.33 (0.58, 3.08) | 0.5044 | 0.7939 |
| *SNAI1* | AI-initiated | 1.07 (0.73, 1.57) | 0.7419 | 0.9073 |
| SERM-initiated | 0.78 (0.46, 1.32) | 0.3450 | 0.7320 |
| Interaction | 0.73 (0.38, 1.4) | 0.3385 | 0.7320 |
| *CLDN3 (claudin-3)* | AI-initiated | 0.99 (0.68, 1.45) | 0.9629 | 0.9886 |
| SERM-initiated | 1.19 (0.66, 2.13) | 0.5587 | 0.8361 |
| Interaction | 1.2 (0.6, 2.41) | 0.6069 | 0.8611 |
| *BLVRA* | AI-initiated | 1.36 (0.9, 2.07) | 0.1477 | 0.5560 |
| SERM-initiated | 0.96 (0.36, 2.59) | 0.9401 | 0.9843 |
| Interaction | 0.71 (0.24, 2.06) | 0.5238 | 0.8119 |
| *SFRP1* | AI-initiated | 0.87 (0.51, 1.48) | 0.6109 | 0.8611 |
| SERM-initiated | 0.77 (0.37, 1.61) | 0.4900 | 0.7895 |
| Interaction | 0.88 (0.36, 2.19) | 0.7905 | 0.9392 |
| *MYC* | AI-initiated | 0.71 (0.34, 1.48) | 0.3564 | 0.7320 |
| SERM-initiated | 0.86 (0.51, 1.46) | 0.5841 | 0.8528 |
| Interaction | 1.22 (0.49, 3.01) | 0.6662 | 0.8692 |
| *IFT140* | AI-initiated | 0.92 (0.61, 1.41) | 0.7134 | 0.8885 |
| SERM-initiated | 1.25 (0.71, 2.21) | 0.4463 | 0.7647 |
| Interaction | 1.35 (0.67, 2.74) | 0.4056 | 0.7364 |
| *PTTG1* | AI-initiated | 1.25 (0.55, 2.85) | 0.5918 | 0.8580 |
| SERM-initiated | 1.4 (0.66, 2.97) | 0.3748 | 0.7354 |
| Interaction | 1.12 (0.37, 3.43) | 0.8423 | 0.9492 |
| *NAT1* | AI-initiated | 1.04 (0.73, 1.49) | 0.8207 | 0.9449 |
| SERM-initiated | 0.83 (0.35, 1.96) | 0.6677 | 0.8692 |
| Interaction | 0.79 (0.31, 2.02) | 0.6288 | 0.8611 |
| *GPR160* | AI-initiated | 1.49 (0.97, 2.29) | 0.0716 | 0.4207 |
| SERM-initiated | 1.45 (0.59, 3.54) | 0.4159 | 0.7464 |
| Interaction | 0.97 (0.36, 2.64) | 0.9596 | 0.9886 |
| *WNT5B* | AI-initiated | 0.82 (0.34, 1.96) | 0.6484 | 0.8671 |
| SERM-initiated | 1.28 (0.76, 2.17) | 0.3539 | 0.7320 |
| Interaction | 1.57 (0.57, 4.36) | 0.3845 | 0.7354 |
| *PIK3CA* | AI-initiated | 0.8 (0.47, 1.38) | 0.4308 | 0.7554 |
| SERM-initiated | 1.13 (0.7, 1.83) | 0.6204 | 0.8611 |
| Interaction | 1.41 (0.68, 2.91) | 0.3584 | 0.7320 |
| *GSK3B* | AI-initiated | 0.91 (0.55, 1.5) | 0.7075 | 0.8885 |
| SERM-initiated | 1.08 (0.51, 2.29) | 0.8445 | 0.9492 |
| Interaction | 1.19 (0.48, 2.93) | 0.7106 | 0.8885 |
| *CRYBB2* | AI-initiated | 1.17 (0.9, 1.51) | 0.2388 | 0.6645 |
| SERM-initiated | 0.85 (0.33, 2.22) | 0.7384 | 0.9060 |
| Interaction | 0.73 (0.27, 1.96) | 0.5296 | 0.8167 |
| *MUC1* | AI-initiated | 1.42 (0.92, 2.21) | 0.1154 | 0.4887 |
| SERM-initiated | 1.98 (0.86, 4.56) | 0.1081 | 0.4887 |
| Interaction | 1.39 (0.55, 3.53) | 0.4869 | 0.7895 |
| *CD44* | AI-initiated | 0.97 (0.54, 1.76) | 0.9235 | 0.9843 |
| SERM-initiated | 0.95 (0.37, 2.46) | 0.9192 | 0.9843 |
| Interaction | 0.98 (0.32, 3) | 0.9722 | 0.9929 |
| *SFRP2* | AI-initiated | 0.81 (0.51, 1.3) | 0.3888 | 0.7354 |
| SERM-initiated | 0.73 (0.44, 1.21) | 0.2209 | 0.6472 |
| Interaction | 0.9 (0.45, 1.78) | 0.7581 | 0.9212 |
| *CD29* | AI-initiated | 1.19 (0.58, 2.45) | 0.6289 | 0.8611 |
| SERM-initiated | 1.08 (0.75, 1.54) | 0.6797 | 0.8792 |
| Interaction | 0.9 (0.4, 2.02) | 0.8029 | 0.9417 |
| *BCL2* | AI-initiated | 0.76 (0.29, 1.96) | 0.5695 | 0.8412 |
| SERM-initiated | 0.98 (0.51, 1.89) | 0.9617 | 0.9886 |
| Interaction | 1.3 (0.41, 4.09) | 0.6591 | 0.8692 |
| *CD27* | AI-initiated | 0.85 (0.48, 1.48) | 0.5587 | 0.8361 |
| SERM-initiated | 0.79 (0.42, 1.49) | 0.4742 | 0.7849 |
| Interaction | 0.94 (0.4, 2.19) | 0.8830 | 0.9744 |
| *MLPH* | AI-initiated | 1.15 (0.8, 1.64) | 0.4546 | 0.7689 |
| SERM-initiated | 0.97 (0.38, 2.47) | 0.9436 | 0.9843 |
| Interaction | 0.84 (0.31, 2.3) | 0.7385 | 0.9060 |
| *TWIST2* | AI-initiated | 0.81 (0.46, 1.42) | 0.4658 | 0.7743 |
| SERM-initiated | 0.84 (0.51, 1.38) | 0.4902 | 0.7895 |
| Interaction | 1.03 (0.49, 2.18) | 0.9299 | 0.9843 |
| *LEF1* | AI-initiated | 1.19 (0.98, 1.44) | 0.0723 | 0.4207 |
| SERM-initiated | 1.15 (0.53, 2.5) | 0.7285 | 0.8995 |
| Interaction | 0.96 (0.43, 2.15) | 0.9304 | 0.9843 |
| *SLC39A6* | AI-initiated | 0.83 (0.34, 2.02) | 0.6868 | 0.8814 |
| SERM-initiated | 0.87 (0.51, 1.46) | 0.5921 | 0.8580 |
| Interaction | 1.04 (0.37, 2.9) | 0.9406 | 0.9843 |
| *WDR77* | AI-initiated | 1 (0.67, 1.5) | 0.9957 | 0.9965 |
| SERM-initiated | 1.07 (0.4, 2.89) | 0.8944 | 0.9757 |
| Interaction | 1.07 (0.37, 3.13) | 0.9005 | 0.9795 |
| *PHGDH* | AI-initiated | 1.19 (0.73, 1.95) | 0.4789 | 0.7893 |
| SERM-initiated | 1.31 (0.59, 2.92) | 0.5072 | 0.7950 |
| Interaction | 1.1 (0.43, 2.81) | 0.8454 | 0.9492 |
| *BORCS7* | AI-initiated | 1.03 (0.66, 1.6) | 0.8908 | 0.9746 |
| SERM-initiated | 1.29 (0.56, 2.96) | 0.5455 | 0.8312 |
| Interaction | 1.25 (0.49, 3.19) | 0.6369 | 0.8611 |
| *BCL2L1* | AI-initiated | 1.4 (0.81, 2.41) | 0.2265 | 0.6472 |
| SERM-initiated | 1.33 (0.81, 2.18) | 0.2673 | 0.7049 |
| Interaction | 0.95 (0.45, 1.99) | 0.8886 | 0.9746 |
| *EGF* | AI-initiated | 0.96 (0.66, 1.4) | 0.8247 | 0.9449 |
| SERM-initiated | 0.84 (0.45, 1.54) | 0.5644 | 0.8385 |
| Interaction | 0.87 (0.42, 1.79) | 0.7084 | 0.8885 |
| *FGFR4* | AI-initiated | 0.96 (0.72, 1.28) | 0.7625 | 0.9217 |
| SERM-initiated | 1.11 (0.26, 4.76) | 0.8866 | 0.9746 |
| Interaction | 1.16 (0.26, 5.11) | 0.8427 | 0.9492 |
| *GPC4* | AI-initiated | 1.75 (1.22, 2.51) | 0.0023 | 0.0635 |
| SERM-initiated | 1.43 (0.69, 2.99) | 0.3370 | 0.7320 |
| Interaction | 0.82 (0.36, 1.84) | 0.6281 | 0.8611 |
| *ZEB1* | AI-initiated | 0.76 (0.4, 1.44) | 0.3994 | 0.7364 |
| SERM-initiated | 0.94 (0.61, 1.46) | 0.7932 | 0.9392 |
| Interaction | 1.24 (0.57, 2.71) | 0.5822 | 0.8528 |
| *ITGB6* | AI-initiated | 1.41 (0.79, 2.52) | 0.2514 | 0.6750 |
| SERM-initiated | 1.41 (1.23, 1.61) | 0.0000 | 0.0003 |
| Interaction | 1 (0.55, 1.84) | 0.9965 | 0.9965 |
| *ESR1* | AI-initiated | 1.21 (0.8, 1.83) | 0.3675 | 0.7320 |
| SERM-initiated | 1.35 (0.38, 4.83) | 0.6455 | 0.8669 |
| Interaction | 1.11 (0.29, 4.26) | 0.8738 | 0.9744 |
| *SQLE* | AI-initiated | 0.96 (0.69, 1.33) | 0.7973 | 0.9392 |
| SERM-initiated | 1.09 (0.44, 2.72) | 0.8532 | 0.9551 |
| Interaction | 1.14 (0.43, 3.01) | 0.7939 | 0.9392 |

**Table S4**. Multivariable Cox proportional hazards models for time-to-recurrence with interaction between baseline gene expression and initial endocrine therapy for postmenopausal cohort

| **Gene** | **Initial endocrine therapy type** | **Hazard ratio (95% CI)** | **P value (raw)** | **P value (adjusted)** |
| --- | --- | --- | --- | --- |
| *TP53* | AI-initiated | 0.47 (0.2, 1.1) | 0.0817 | 0.4460 |
| SERM-initiated | 5.5 (0.92, 32.72) | 0.0610 | 0.4119 |
| Interaction | 11.65 (1.65, 82.5) | 0.0139 | 0.2228 |
| *WNT7B* | AI-initiated | 1.01 (0.66, 1.54) | 0.9595 | 0.9825 |
| SERM-initiated | 16.48 (2.9, 93.53) | 0.0016 | 0.1049 |
| Interaction | 16.3 (2.37, 112.36) | 0.0046 | 0.1272 |
| *UBE2T* | AI-initiated | 0.92 (0.39, 2.16) | 0.8407 | 0.9341 |
| SERM-initiated | 20.06 (0.24, 1690.39) | 0.1850 | 0.5224 |
| Interaction | 21.9 (0.19, 2502.52) | 0.2018 | 0.5267 |
| *BAG1* | AI-initiated | 0.86 (0.58, 1.27) | 0.4428 | 0.7026 |
| SERM-initiated | 23.37 (0.63, 871.23) | 0.0878 | 0.4460 |
| Interaction | 27.29 (0.67, 1106.75) | 0.0801 | 0.4460 |
| *ACTR3B* | AI-initiated | 0.43 (0.15, 1.22) | 0.1117 | 0.4664 |
| SERM-initiated | 2.41 (0.71, 8.21) | 0.1582 | 0.5224 |
| Interaction | 5.63 (0.92, 34.39) | 0.0611 | 0.4119 |
| *PIK3R5* | AI-initiated | 2.82 (1.11, 7.2) | 0.0300 | 0.3557 |
| SERM-initiated | 0.39 (0.03, 5.14) | 0.4736 | 0.7260 |
| Interaction | 0.14 (0.01, 3.24) | 0.2188 | 0.5421 |
| *MELK* | AI-initiated | 0.97 (0.4, 2.4) | 0.9535 | 0.9825 |
| SERM-initiated | -- | 0.1816 | 0.5224 |
| Interaction | -- | 0.1907 | 0.5267 |
| *CCND1* | AI-initiated | 0.04 (0, 4.04) | 0.1680 | 0.5224 |
| SERM-initiated | 0.03 (0, 402591.58) | 0.6833 | 0.8491 |
| Interaction | 0.92 (0, 169545764.24) | 0.9933 | 0.9933 |
| *MMP11* | AI-initiated | 0.3 (0.04, 2.47) | 0.2624 | 0.5792 |
| SERM-initiated | 146.75 (2.6, 8297.59) | 0.0154 | 0.2272 |
| Interaction | 491.24 (6.73, 35840.72) | 0.0046 | 0.1272 |
| *MAPT* | AI-initiated | 0.83 (0.29, 2.44) | 0.7393 | 0.8763 |
| SERM-initiated | 0 (0, 7.79) | 0.1452 | 0.4980 |
| Interaction | 0 (0, 18.57) | 0.1936 | 0.5267 |
| *KRT17* | AI-initiated | 0.43 (0.17, 1.07) | 0.0699 | 0.4397 |
| SERM-initiated | 0.69 (0.3, 1.57) | 0.3740 | 0.6619 |
| Interaction | 1.6 (0.55, 4.66) | 0.3906 | 0.6776 |
| *FOXA1* | AI-initiated | 0.48 (0.2, 1.11) | 0.0874 | 0.4460 |
| SERM-initiated | 33.62 (4.43, 255.26) | 0.0007 | 0.0868 |
| Interaction | 70.52 (6.84, 726.74) | 0.0003 | 0.0670 |
| *BRCA1* | AI-initiated | 0.63 (0.29, 1.38) | 0.2481 | 0.5761 |
| SERM-initiated | 0.98 (0.01, 102.34) | 0.9929 | 0.9933 |
| Interaction | 1.55 (0.01, 162.16) | 0.8543 | 0.9341 |
| *IGF1* | AI-initiated | 2.82 (1.03, 7.66) | 0.0426 | 0.3644 |
| SERM-initiated | 0.14 (0, 10.67) | 0.3726 | 0.6619 |
| Interaction | 0.05 (0, 6.73) | 0.2301 | 0.5592 |
| *CDC6* | AI-initiated | 0.75 (0.25, 2.22) | 0.6043 | 0.8029 |
| SERM-initiated | -- | 0.0885 | 0.4460 |
| Interaction | -- | 0.0999 | 0.4605 |
| *ITPR1* | AI-initiated | 1.14 (0.75, 1.74) | 0.5368 | 0.7578 |
| SERM-initiated | 1.77 (0.11, 28.8) | 0.6867 | 0.8507 |
| Interaction | 1.55 (0.08, 30.88) | 0.7729 | 0.8826 |
| *UBE2C* | AI-initiated | 1.18 (0.54, 2.6) | 0.6774 | 0.8473 |
| SERM-initiated | 158.5 (0.46, 54823.38) | 0.0894 | 0.4460 |
| Interaction | 134.07 (0.24, 73884.28) | 0.1282 | 0.4875 |
| *MKI67* | AI-initiated | 0.86 (0.32, 2.28) | 0.7599 | 0.8826 |
| SERM-initiated | 18.64 (0.92, 378.34) | 0.0569 | 0.4119 |
| Interaction | 21.69 (0.54, 864.49) | 0.1017 | 0.4605 |
| *CDCA1* | AI-initiated | 0.85 (0.31, 2.33) | 0.7578 | 0.8826 |
| SERM-initiated | -- | 0.1481 | 0.4989 |
| Interaction | -- | 0.1684 | 0.5224 |
| *MYBL2* | AI-initiated | 0.71 (0.27, 1.85) | 0.4788 | 0.7296 |
| SERM-initiated | 0.05 (0, 38.16) | 0.3704 | 0.6619 |
| Interaction | 0.07 (0, 58.55) | 0.4327 | 0.7015 |
| *PSPHL* | AI-initiated | 0.63 (0.2, 1.97) | 0.4285 | 0.7015 |
| SERM-initiated | 2.65 (1.25, 5.65) | 0.0115 | 0.1978 |
| Interaction | 4.2 (0.87, 20.19) | 0.0734 | 0.4460 |
| *TP63* | AI-initiated | 2.6 (0.13, 53.44) | 0.5364 | 0.7578 |
| SERM-initiated | 0.7 (0.04, 13.39) | 0.8110 | 0.9106 |
| Interaction | 0.27 (0, 17.03) | 0.5346 | 0.7578 |
| *ANLN* | AI-initiated | 1.06 (0.42, 2.69) | 0.9029 | 0.9526 |
| SERM-initiated | 249.55 (0.25, 247469.37) | 0.1169 | 0.4799 |
| Interaction | 235.47 (0.38, 146399.86) | 0.0961 | 0.4605 |
| *MTOR* | AI-initiated | 0.87 (0.31, 2.45) | 0.7882 | 0.8903 |
| SERM-initiated | 3.48 (0.68, 17.88) | 0.1360 | 0.4964 |
| Interaction | 4.01 (0.52, 31.02) | 0.1836 | 0.5224 |
| *KRT14* | AI-initiated | 4.33 (0.53, 35.17) | 0.1701 | 0.5224 |
| SERM-initiated | 0.26 (0, 58.04) | 0.6271 | 0.8247 |
| Interaction | 0.06 (0, 20.22) | 0.3442 | 0.6390 |
| *CEP55* | AI-initiated | 0.76 (0.29, 1.97) | 0.5661 | 0.7783 |
| SERM-initiated | 12.97 (1.34, 125.61) | 0.0270 | 0.3342 |
| Interaction | 17.17 (0.94, 312.87) | 0.0549 | 0.4119 |
| *WNT11* | AI-initiated | 3.54 (1.25, 10.02) | 0.0171 | 0.2435 |
| SERM-initiated | 1.66 (0.01, 393.92) | 0.8562 | 0.9341 |
| Interaction | 0.47 (0, 95.08) | 0.7795 | 0.8840 |
| *PIK3R2* | AI-initiated | 1.1 (0.64, 1.87) | 0.7366 | 0.8757 |
| SERM-initiated | 4.77 (1.04, 21.92) | 0.0446 | 0.3644 |
| Interaction | 4.35 (0.96, 19.76) | 0.0566 | 0.4119 |
| *CDCA8* | AI-initiated | 1.11 (0.55, 2.21) | 0.7746 | 0.8826 |
| SERM-initiated | 8.43 (0.16, 443.08) | 0.2916 | 0.6021 |
| Interaction | 7.62 (0.16, 353.29) | 0.2996 | 0.6088 |
| *ORC6L* | AI-initiated | 0.78 (0.36, 1.69) | 0.5339 | 0.7578 |
| SERM-initiated | 4.34 (0.27, 70.15) | 0.3012 | 0.6088 |
| Interaction | 5.53 (0.26, 118.06) | 0.2732 | 0.5918 |
| *GRB7* | AI-initiated | 0.57 (0.14, 2.34) | 0.4332 | 0.7015 |
| SERM-initiated | 6.47 (1.32, 31.79) | 0.0216 | 0.2860 |
| Interaction | 11.4 (0.73, 177.48) | 0.0823 | 0.4460 |
| *KIF2C* | AI-initiated | 0.99 (0.47, 2.09) | 0.9770 | 0.9925 |
| SERM-initiated | 1240.23 (1.07, 1431784.27) | 0.0477 | 0.3739 |
| Interaction | 1253.97 (1.57, 1001069.56) | 0.0364 | 0.3644 |
| *TMEM45B* | AI-initiated | 2.27 (1.2, 4.31) | 0.0119 | 0.1978 |
| SERM-initiated | 4.3 (1.66, 11.13) | 0.0027 | 0.1139 |
| Interaction | 1.89 (0.71, 5.01) | 0.2005 | 0.5267 |
| *CENPF* | AI-initiated | 1.26 (0.53, 2.98) | 0.5970 | 0.7960 |
| SERM-initiated | 9.31 (0.62, 140.07) | 0.1069 | 0.4605 |
| Interaction | 7.38 (0.29, 186.79) | 0.2254 | 0.5514 |
| *RRM2* | AI-initiated | 1.06 (0.45, 2.46) | 0.8977 | 0.9526 |
| SERM-initiated | 11.35 (0.44, 290.98) | 0.1421 | 0.4964 |
| Interaction | 10.74 (0.25, 452.71) | 0.2135 | 0.5420 |
| *CD8A* | AI-initiated | 1.08 (0.71, 1.64) | 0.7120 | 0.8622 |
| SERM-initiated | 0.04 (0, 10.81) | 0.2606 | 0.5792 |
| Interaction | 0.04 (0, 10.15) | 0.2505 | 0.5761 |
| *APOE* | AI-initiated | 0.82 (0.28, 2.39) | 0.7170 | 0.8622 |
| SERM-initiated | 0.46 (0.1, 2.06) | 0.3083 | 0.6134 |
| Interaction | 0.56 (0.1, 3.28) | 0.5182 | 0.7491 |
| *CXXC5* | AI-initiated | 0.47 (0.13, 1.71) | 0.2545 | 0.5792 |
| SERM-initiated | 0.01 (0, 4.07) | 0.1264 | 0.4875 |
| Interaction | 0.01 (0, 6.98) | 0.1796 | 0.5224 |
| *HMGA2* | AI-initiated | 0.57 (0.28, 1.13) | 0.1077 | 0.4605 |
| SERM-initiated | 2.34 (0.36, 15.42) | 0.3766 | 0.6628 |
| Interaction | 4.13 (0.63, 27.12) | 0.1394 | 0.4964 |
| *CDH3* | AI-initiated | 0.83 (0.34, 2.02) | 0.6799 | 0.8476 |
| SERM-initiated | 0.5 (0.15, 1.63) | 0.2475 | 0.5761 |
| Interaction | 0.6 (0.12, 2.93) | 0.5265 | 0.7572 |
| *FGFR3* | AI-initiated | 0.69 (0.26, 1.79) | 0.4415 | 0.7026 |
| SERM-initiated | 0 (0, 0.38) | 0.0417 | 0.3644 |
| Interaction | 0 (0, 0.63) | 0.0460 | 0.3676 |
| *TOP2A* | AI-initiated | 0.99 (0.3, 3.25) | 0.9914 | 0.9933 |
| SERM-initiated | -- | 0.0986 | 0.4605 |
| Interaction | -- | 0.1031 | 0.4605 |
| *WNT5A* | AI-initiated | 0.61 (0.27, 1.38) | 0.2350 | 0.5676 |
| SERM-initiated | 1.15 (0.29, 4.6) | 0.8397 | 0.9341 |
| Interaction | 1.9 (0.38, 9.37) | 0.4311 | 0.7015 |
| *BIRC5* | AI-initiated | 0.35 (0.04, 2.89) | 0.3325 | 0.6390 |
| SERM-initiated | -- | 0.2446 | 0.5761 |
| Interaction | -- | 0.2479 | 0.5761 |
| *TFF1* | AI-initiated | 1.01 (0.47, 2.18) | 0.9723 | 0.9920 |
| SERM-initiated | 1.99 (0.84, 4.71) | 0.1175 | 0.4799 |
| Interaction | 1.96 (0.48, 8) | 0.3463 | 0.6390 |
| *KNTC2* | AI-initiated | 1.07 (0.39, 2.9) | 0.8977 | 0.9526 |
| SERM-initiated | 22.53 (1.26, 403.36) | 0.0344 | 0.3644 |
| Interaction | 21.1 (0.67, 668.72) | 0.0838 | 0.4460 |
| *SYTL4* | AI-initiated | 0.54 (0.17, 1.76) | 0.3076 | 0.6134 |
| SERM-initiated | 0.02 (0, 0.38) | 0.0085 | 0.1912 |
| Interaction | 0.04 (0, 0.93) | 0.0445 | 0.3644 |
| *MIA* | AI-initiated | 0.95 (0.43, 2.09) | 0.8904 | 0.9526 |
| SERM-initiated | 0.3 (0.05, 1.94) | 0.2073 | 0.5342 |
| Interaction | 0.32 (0.04, 2.53) | 0.2793 | 0.5918 |
| *VRD* | AI-initiated | 1.03 (0.71, 1.51) | 0.8722 | 0.9460 |
| SERM-initiated | 0.17 (0, 10.24) | 0.3970 | 0.6776 |
| Interaction | 0.17 (0, 10.27) | 0.3927 | 0.6776 |
| *CDC20* | AI-initiated | 0.74 (0.19, 2.88) | 0.6641 | 0.8416 |
| SERM-initiated | 14.03 (0.27, 735.38) | 0.1910 | 0.5267 |
| Interaction | 18.97 (0.12, 3119.43) | 0.2583 | 0.5792 |
| *CCNE1* | AI-initiated | 0.82 (0.46, 1.44) | 0.4896 | 0.7373 |
| SERM-initiated | 1.77 (0.23, 13.68) | 0.5835 | 0.7890 |
| Interaction | 2.16 (0.23, 20.15) | 0.4976 | 0.7435 |
| *EZH2* | AI-initiated | 1.26 (0.72, 2.19) | 0.4115 | 0.6930 |
| SERM-initiated | 20.39 (3.11, 133.58) | 0.0017 | 0.1049 |
| Interaction | 16.17 (2.79, 93.73) | 0.0019 | 0.1049 |
| *PRKCA* | AI-initiated | 1.08 (0.42, 2.74) | 0.8746 | 0.9460 |
| SERM-initiated | 0.4 (0.05, 3.03) | 0.3780 | 0.6628 |
| Interaction | 0.37 (0.04, 3.75) | 0.4035 | 0.6847 |
| *CCNB1* | AI-initiated | 1.15 (0.45, 2.9) | 0.7737 | 0.8826 |
| SERM-initiated | 16.03 (0.45, 573.22) | 0.1285 | 0.4875 |
| Interaction | 13.99 (0.22, 901.31) | 0.2146 | 0.5420 |
| *MDM2* | AI-initiated | 0.64 (0.32, 1.3) | 0.2163 | 0.5421 |
| SERM-initiated | 0.03 (0, 5.38) | 0.1837 | 0.5224 |
| Interaction | 0.04 (0, 7.92) | 0.2395 | 0.5749 |
| *PIK3R1* | AI-initiated | 1.36 (0.64, 2.88) | 0.4217 | 0.7006 |
| SERM-initiated | 0 (0, 55.37) | 0.1295 | 0.4875 |
| Interaction | 0 (0, 54.55) | 0.1273 | 0.4875 |
| *CD49* | AI-initiated | 0.84 (0.39, 1.85) | 0.6703 | 0.8463 |
| SERM-initiated | 0.25 (0.04, 1.59) | 0.1416 | 0.4964 |
| Interaction | 0.3 (0.05, 1.93) | 0.2030 | 0.5267 |
| *WNT4* | AI-initiated | 0.51 (0.23, 1.16) | 0.1080 | 0.4605 |
| SERM-initiated | 0.01 (0, 195.31) | 0.3459 | 0.6390 |
| Interaction | 0.01 (0, 361.77) | 0.4134 | 0.6932 |
| *ALDH1A1* | AI-initiated | 1.21 (0.55, 2.66) | 0.6310 | 0.8252 |
| SERM-initiated | 0.03 (0, 4.83) | 0.1774 | 0.5224 |
| Interaction | 0.03 (0, 6.03) | 0.1883 | 0.5267 |
| *WNT10A* | AI-initiated | 0.32 (0.09, 1.16) | 0.0820 | 0.4460 |
| SERM-initiated | 0.56 (0.03, 10.13) | 0.6940 | 0.8542 |
| Interaction | 1.75 (0.11, 28.05) | 0.6917 | 0.8541 |
| *ZEB2* | AI-initiated | 1.57 (0.61, 4.04) | 0.3457 | 0.6390 |
| SERM-initiated | 1.17 (0.02, 78.37) | 0.9403 | 0.9779 |
| Interaction | 0.75 (0.01, 45.47) | 0.8890 | 0.9526 |
| *WNT6* | AI-initiated | 1.7 (0.83, 3.5) | 0.1475 | 0.4989 |
| SERM-initiated | 8.33 (0.12, 566.92) | 0.3250 | 0.6335 |
| Interaction | 4.89 (0.06, 368.58) | 0.4717 | 0.7260 |
| *TYMS* | AI-initiated | 1.31 (0.58, 2.94) | 0.5189 | 0.7491 |
| SERM-initiated | 41.43 (1.42, 1210.61) | 0.0306 | 0.3557 |
| Interaction | 31.73 (0.87, 1160.89) | 0.0598 | 0.4119 |
| *KRT5* | AI-initiated | 24.31 (0.78, 754.01) | 0.0686 | 0.4391 |
| SERM-initiated | 0.18 (0.01, 4.78) | 0.3029 | 0.6089 |
| Interaction | 0.01 (0, 1.3) | 0.0626 | 0.4146 |
| *EXO1* | AI-initiated | 0.87 (0.42, 1.8) | 0.7060 | 0.8607 |
| SERM-initiated | 40.86 (0.29, 5750.48) | 0.1416 | 0.4964 |
| Interaction | 46.98 (0.22, 10025.22) | 0.1595 | 0.5224 |
| *PIK3CD* | AI-initiated | 1.23 (0.66, 2.31) | 0.5168 | 0.7491 |
| SERM-initiated | 2.27 (0.26, 19.95) | 0.4610 | 0.7202 |
| Interaction | 1.84 (0.27, 12.55) | 0.5336 | 0.7578 |
| *SP110* | AI-initiated | 1.2 (0.66, 2.17) | 0.5564 | 0.7759 |
| SERM-initiated | 0.62 (0.08, 4.58) | 0.6392 | 0.8293 |
| Interaction | 0.52 (0.06, 4.5) | 0.5510 | 0.7722 |
| *PIK3R3* | AI-initiated | 2.08 (0.97, 4.49) | 0.0607 | 0.4119 |
| SERM-initiated | 1.12 (0.36, 3.5) | 0.8438 | 0.9341 |
| Interaction | 0.54 (0.13, 2.24) | 0.3937 | 0.6776 |
| *FOXC1* | AI-initiated | 0.96 (0.33, 2.82) | 0.9422 | 0.9779 |
| SERM-initiated | 0.2 (0.01, 4.65) | 0.3163 | 0.6228 |
| Interaction | 0.21 (0.01, 5.27) | 0.3415 | 0.6390 |
| *PLCB1* | AI-initiated | 1.4 (0.93, 2.11) | 0.1091 | 0.4605 |
| SERM-initiated | 5.96 (0.57, 61.74) | 0.1347 | 0.4964 |
| Interaction | 4.26 (0.36, 50.41) | 0.2506 | 0.5761 |
| *CCND2* | AI-initiated | 1.1 (0.57, 2.12) | 0.7696 | 0.8826 |
| SERM-initiated | 0.98 (0.08, 12.03) | 0.9869 | 0.9933 |
| Interaction | 0.89 (0.06, 12.25) | 0.9293 | 0.9708 |
| *TWIST1* | AI-initiated | 1.12 (0.69, 1.81) | 0.6575 | 0.8404 |
| SERM-initiated | -- | 0.0102 | 0.1913 |
| Interaction | -- | 0.0104 | 0.1913 |
| *AKT3* | AI-initiated | 2.27 (0.91, 5.64) | 0.0779 | 0.4460 |
| SERM-initiated | 14.32 (0.75, 274.56) | 0.0773 | 0.4460 |
| Interaction | 6.31 (0.53, 75.16) | 0.1449 | 0.4980 |
| *PGR* | AI-initiated | 0.1 (0, 96.08) | 0.5107 | 0.7491 |
| SERM-initiated | 0 (0, 28.41) | 0.2006 | 0.5267 |
| Interaction | 0.02 (0, 27.58) | 0.2845 | 0.5969 |
| *THY1* | AI-initiated | 1.93 (0.74, 5) | 0.1760 | 0.5224 |
| SERM-initiated | -- | 0.0003 | 0.0670 |
| Interaction | -- | 0.0009 | 0.0880 |
| *CREBBP* | AI-initiated | 1.67 (0.58, 4.84) | 0.3419 | 0.6390 |
| SERM-initiated | 0.16 (0.02, 1.27) | 0.0834 | 0.4460 |
| Interaction | 0.09 (0.01, 0.88) | 0.0383 | 0.3644 |
| *VIM* | AI-initiated | 1.2 (0.41, 3.53) | 0.7346 | 0.8757 |
| SERM-initiated | 19.35 (0.01, 34788.76) | 0.4384 | 0.7015 |
| Interaction | 16.07 (0.01, 17562.05) | 0.4366 | 0.7015 |
| *MAPK10* | AI-initiated | 0.92 (0.47, 1.77) | 0.7918 | 0.8916 |
| SERM-initiated | 38.86 (1.73, 875.15) | 0.0213 | 0.2860 |
| Interaction | 42.47 (1.33, 1358.49) | 0.0340 | 0.3644 |
| *STAT1* | AI-initiated | 1.01 (0.69, 1.48) | 0.9554 | 0.9825 |
| SERM-initiated | 0.05 (0, 4.96) | 0.2002 | 0.5267 |
| Interaction | 0.05 (0, 4.72) | 0.1949 | 0.5267 |
| *CLDN4 (claudin-4)* | AI-initiated | 1.32 (0.57, 3.08) | 0.5182 | 0.7491 |
| SERM-initiated | 1.24 (0.5, 3.08) | 0.6498 | 0.8358 |
| Interaction | 0.93 (0.3, 2.87) | 0.9061 | 0.9533 |
| *HGF* | AI-initiated | 0.81 (0.36, 1.79) | 0.5961 | 0.7960 |
| SERM-initiated | 0.28 (0.05, 1.62) | 0.1558 | 0.5201 |
| Interaction | 0.35 (0.06, 2.16) | 0.2584 | 0.5792 |
| *CLDN7 (claudin-7)* | AI-initiated | 0.79 (0.39, 1.61) | 0.5124 | 0.7491 |
| SERM-initiated | 13.82 (0.68, 281.17) | 0.0876 | 0.4460 |
| Interaction | 17.53 (0.6, 513.7) | 0.0965 | 0.4605 |
| *CD10* | AI-initiated | 0.88 (0.36, 2.14) | 0.7731 | 0.8826 |
| SERM-initiated | 0.48 (0.08, 2.89) | 0.4233 | 0.7006 |
| Interaction | 0.55 (0.06, 5.11) | 0.5970 | 0.7960 |
| *IGF1R* | AI-initiated | 1.11 (0.97, 1.26) | 0.1246 | 0.4875 |
| SERM-initiated | 0 (0, 0) | 0.0041 | 0.1272 |
| Interaction | 0 (0, 0) | 0.0041 | 0.1272 |
| *EGFR* | AI-initiated | 3.05 (0.6, 15.57) | 0.1793 | 0.5224 |
| SERM-initiated | 1.05 (0.01, 100.03) | 0.9830 | 0.9933 |
| Interaction | 0.34 (0, 82.54) | 0.7029 | 0.8596 |
| *EpCAM* | AI-initiated | 1.18 (0.46, 3.03) | 0.7283 | 0.8712 |
| SERM-initiated | 3.53 (0.56, 22.28) | 0.1803 | 0.5224 |
| Interaction | 2.98 (0.52, 17.25) | 0.2221 | 0.5467 |
| *WNT2* | AI-initiated | 1.05 (0.48, 2.3) | 0.9013 | 0.9526 |
| SERM-initiated | 4.29 (0.3, 60.5) | 0.2804 | 0.5918 |
| Interaction | 4.09 (0.32, 52.62) | 0.2805 | 0.5918 |
| *SNAI2* | AI-initiated | 1.37 (0.62, 3.05) | 0.4354 | 0.7015 |
| SERM-initiated | 0.18 (0.02, 1.76) | 0.1422 | 0.4964 |
| Interaction | 0.13 (0.01, 1.91) | 0.1380 | 0.4964 |
| *PIK3CG* | AI-initiated | 0.84 (0.4, 1.74) | 0.6385 | 0.8293 |
| SERM-initiated | 0.15 (0.03, 0.78) | 0.0240 | 0.3067 |
| Interaction | 0.18 (0.03, 1.06) | 0.0577 | 0.4119 |
| *CK8/18* | AI-initiated | 1.08 (0.65, 1.8) | 0.7712 | 0.8826 |
| SERM-initiated | 2.55 (0.5, 13.01) | 0.2609 | 0.5792 |
| Interaction | 2.36 (0.5, 11.1) | 0.2765 | 0.5918 |
| *PTEN* | AI-initiated | 1.48 (0.71, 3.08) | 0.2914 | 0.6021 |
| SERM-initiated | 1.59 (0.43, 5.94) | 0.4877 | 0.7373 |
| Interaction | 1.08 (0.22, 5.37) | 0.9292 | 0.9708 |
| *ERBB2* | AI-initiated | 0.77 (0.35, 1.66) | 0.5017 | 0.7467 |
| SERM-initiated | 1.19 (0.37, 3.85) | 0.7662 | 0.8826 |
| Interaction | 1.56 (0.35, 6.96) | 0.5630 | 0.7777 |
| *CD24* | AI-initiated | 1.02 (0.45, 2.33) | 0.9545 | 0.9825 |
| SERM-initiated | 7.2 (1.05, 49.19) | 0.0441 | 0.3644 |
| Interaction | 7.03 (0.69, 71.51) | 0.0994 | 0.4605 |
| *CDH1* | AI-initiated | 0.85 (0.38, 1.91) | 0.7023 | 0.8596 |
| SERM-initiated | 9.49 (1.71, 52.79) | 0.0102 | 0.1913 |
| Interaction | 11.1 (1.6, 76.86) | 0.0148 | 0.2267 |
| *SNAI1* | AI-initiated | 0.97 (0.56, 1.67) | 0.9016 | 0.9526 |
| SERM-initiated | 0.6 (0.29, 1.23) | 0.1613 | 0.5224 |
| Interaction | 0.62 (0.26, 1.46) | 0.2756 | 0.5918 |
| *CLDN3 (claudin-3)* | AI-initiated | 0.79 (0.36, 1.74) | 0.5577 | 0.7759 |
| SERM-initiated | 0.7 (0.14, 3.56) | 0.6722 | 0.8463 |
| Interaction | 0.89 (0.15, 5.19) | 0.8996 | 0.9526 |
| *BLVRA* | AI-initiated | 1.11 (0.63, 1.94) | 0.7185 | 0.8622 |
| SERM-initiated | 1.68 (0.18, 15.67) | 0.6492 | 0.8358 |
| Interaction | 1.52 (0.12, 19.41) | 0.7494 | 0.8826 |
| *SFRP1* | AI-initiated | 1.39 (0.67, 2.87) | 0.3720 | 0.6619 |
| SERM-initiated | 0.14 (0, 3.94) | 0.2469 | 0.5761 |
| Interaction | 0.1 (0, 3.66) | 0.2096 | 0.5365 |
| *MYC* | AI-initiated | 0.75 (0.29, 1.99) | 0.5695 | 0.7783 |
| SERM-initiated | 0.13 (0, 6.78) | 0.3102 | 0.6141 |
| Interaction | 0.17 (0, 6.89) | 0.3480 | 0.6390 |
| *IFT140* | AI-initiated | 0.74 (0.32, 1.7) | 0.4737 | 0.7260 |
| SERM-initiated | 0 (0, 115.68) | 0.1758 | 0.5224 |
| Interaction | 0 (0, 256.25) | 0.2026 | 0.5267 |
| *PTTG1* | AI-initiated | 1.33 (0.37, 4.82) | 0.6623 | 0.8416 |
| SERM-initiated | 12.93 (0.07, 2452.14) | 0.3389 | 0.6390 |
| Interaction | 9.71 (0.02, 3941.93) | 0.4583 | 0.7202 |
| *NAT1* | AI-initiated | 1.3 (0.79, 2.12) | 0.2999 | 0.6088 |
| SERM-initiated | 0 (0, 5.03) | 0.1284 | 0.4875 |
| Interaction | 0 (0, 4.69) | 0.1211 | 0.4875 |
| *GPR160* | AI-initiated | 1.57 (0.58, 4.28) | 0.3740 | 0.6619 |
| SERM-initiated | 1.33 (0.29, 6.02) | 0.7142 | 0.8622 |
| Interaction | 0.84 (0.14, 4.95) | 0.8496 | 0.9341 |
| *WNT5B* | AI-initiated | 1.09 (0.45, 2.62) | 0.8451 | 0.9341 |
| SERM-initiated | 0.36 (0.02, 6.58) | 0.4931 | 0.7397 |
| Interaction | 0.33 (0.01, 9.04) | 0.5137 | 0.7491 |
| *PIK3CA* | AI-initiated | 1.09 (0.65, 1.84) | 0.7437 | 0.8787 |
| SERM-initiated | 0.94 (0.24, 3.72) | 0.9303 | 0.9708 |
| Interaction | 0.86 (0.2, 3.73) | 0.8427 | 0.9341 |
| *GSK3B* | AI-initiated | 1 (0.55, 1.8) | 0.9881 | 0.9933 |
| SERM-initiated | 0.16 (0.02, 1.12) | 0.0646 | 0.4207 |
| Interaction | 0.16 (0.02, 1.48) | 0.1068 | 0.4605 |
| *CRYBB2* | AI-initiated | 1.01 (0.62, 1.65) | 0.9739 | 0.9920 |
| SERM-initiated | 359.91 (1.55, 83713.16) | 0.0343 | 0.3644 |
| Interaction | 356.98 (1.4, 90915.1) | 0.0376 | 0.3644 |
| *MUC1* | AI-initiated | 1.63 (0.78, 3.4) | 0.1963 | 0.5267 |
| SERM-initiated | 2.73 (0.63, 11.74) | 0.1778 | 0.5224 |
| Interaction | 1.68 (0.27, 10.44) | 0.5799 | 0.7868 |
| *CD44* | AI-initiated | 0.73 (0.27, 1.99) | 0.5435 | 0.7645 |
| SERM-initiated | 3.81 (0.2, 71.01) | 0.3701 | 0.6619 |
| Interaction | 5.19 (0.18, 145.97) | 0.3335 | 0.6390 |
| *SFRP2* | AI-initiated | 0.66 (0.24, 1.82) | 0.4216 | 0.7006 |
| SERM-initiated | 0.83 (0.11, 6.18) | 0.8545 | 0.9341 |
| Interaction | 1.25 (0.11, 13.85) | 0.8532 | 0.9341 |
| *CD29* | AI-initiated | 1.17 (0.58, 2.38) | 0.6588 | 0.8404 |
| SERM-initiated | 1.44 (0.12, 17.13) | 0.7719 | 0.8826 |
| Interaction | 1.23 (0.08, 19.13) | 0.8825 | 0.9520 |
| *BCL2* | AI-initiated | 0.83 (0.36, 1.89) | 0.6508 | 0.8358 |
| SERM-initiated | 0.36 (0.04, 3.07) | 0.3467 | 0.6390 |
| Interaction | 0.43 (0.04, 5.14) | 0.5048 | 0.7484 |
| *CD27* | AI-initiated | 0.7 (0.36, 1.35) | 0.2864 | 0.5977 |
| SERM-initiated | 0.33 (0.07, 1.58) | 0.1664 | 0.5224 |
| Interaction | 0.48 (0.09, 2.64) | 0.3956 | 0.6776 |
| *MLPH* | AI-initiated | 0.91 (0.49, 1.7) | 0.7670 | 0.8826 |
| SERM-initiated | 3.75 (0.11, 125.86) | 0.4614 | 0.7202 |
| Interaction | 4.12 (0.12, 137.58) | 0.4290 | 0.7015 |
| *TWIST2* | AI-initiated | 1.13 (0.49, 2.6) | 0.7804 | 0.8840 |
| SERM-initiated | -- | 0.1753 | 0.5224 |
| Interaction | -- | 0.1808 | 0.5224 |
| *LEF1* | AI-initiated | 0.55 (0.11, 2.84) | 0.4746 | 0.7260 |
| SERM-initiated | 0.45 (0.08, 2.39) | 0.3494 | 0.6390 |
| Interaction | 0.82 (0.09, 7.85) | 0.8639 | 0.9397 |
| *SLC39A6* | AI-initiated | 0.69 (0.19, 2.56) | 0.5794 | 0.7868 |
| SERM-initiated | 2.1 (0.31, 14.44) | 0.4511 | 0.7128 |
| Interaction | 3.04 (0.22, 41.61) | 0.4048 | 0.6847 |
| *WDR77* | AI-initiated | 2.57 (1.36, 4.88) | 0.0038 | 0.1272 |
| SERM-initiated | 0 (0, 0.16) | 0.0055 | 0.1415 |
| Interaction | 0 (0, 0.08) | 0.0024 | 0.1130 |
| *PHGDH* | AI-initiated | 1.28 (0.82, 1.98) | 0.2802 | 0.5918 |
| SERM-initiated | 1.79 (0.48, 6.66) | 0.3823 | 0.6673 |
| Interaction | 1.41 (0.36, 5.47) | 0.6222 | 0.8211 |
| *BORCS7* | AI-initiated | 1.28 (0.55, 2.98) | 0.5675 | 0.7783 |
| SERM-initiated | 8.28 (0.16, 428.79) | 0.2938 | 0.6033 |
| Interaction | 6.47 (0.16, 266.35) | 0.3247 | 0.6335 |
| *BCL2L1* | AI-initiated | 1.32 (0.62, 2.84) | 0.4724 | 0.7260 |
| SERM-initiated | 345.82 (0.48, 249169.11) | 0.0816 | 0.4460 |
| Interaction | 261.38 (0.31, 219878.71) | 0.1053 | 0.4605 |
| *EGF* | AI-initiated | 0.62 (0.35, 1.1) | 0.1012 | 0.4605 |
| SERM-initiated | 0.97 (0.35, 2.68) | 0.9586 | 0.9825 |
| Interaction | 1.56 (0.45, 5.47) | 0.4861 | 0.7373 |
| *FGFR4* | AI-initiated | 0.69 (0.39, 1.24) | 0.2182 | 0.5421 |
| SERM-initiated | -- | 0.0440 | 0.3644 |
| Interaction | -- | 0.0435 | 0.3644 |
| *GPC4* | AI-initiated | 1.73 (0.95, 3.16) | 0.0746 | 0.4460 |
| SERM-initiated | 2.44 (0.69, 8.62) | 0.1664 | 0.5224 |
| Interaction | 1.41 (0.44, 4.49) | 0.5605 | 0.7771 |
| *ZEB1* | AI-initiated | 1.39 (0.36, 5.42) | 0.6318 | 0.8252 |
| SERM-initiated | 1385.13 (0, 563476134.16) | 0.2724 | 0.5918 |
| Interaction | 993.94 (0.01, 149421884.58) | 0.2565 | 0.5792 |
| *ITGB6* | AI-initiated | 1.33 (0.35, 4.98) | 0.6764 | 0.8473 |
| SERM-initiated | 1.84 (1.02, 3.32) | 0.0420 | 0.3644 |
| Interaction | 1.39 (0.24, 7.97) | 0.7121 | 0.8622 |
| *ESR1* | AI-initiated | 1.19 (0.61, 2.32) | 0.6098 | 0.8074 |
| SERM-initiated | 0 (0, 0.23) | 0.0081 | 0.1912 |
| Interaction | 0 (0, 0.26) | 0.0105 | 0.1913 |
| *SQLE* | AI-initiated | 0.88 (0.54, 1.42) | 0.5955 | 0.7960 |
| SERM-initiated | 21.71 (0.03, 15907.92) | 0.3605 | 0.6561 |
| Interaction | 24.71 (0.03, 19125.78) | 0.3446 | 0.6390 |

--: The estimate is approximately infinity.

**Table S5**. Distribution of endocrine therapy–related symptoms and endocrine therapy agents by endocrine therapy class pattern

| **Characteristics** | **Total** (N=30; column %) | **Endocrine therapy class exposure pattern** | | | **P value** |
| --- | --- | --- | --- | --- | --- |
| Aromatase Inhibitor (AI)-onlya (n=11; column %) | Selective estrogen receptor modulator (SERM)-onlyb (n=2; column %) | AI+SERMc (n=17; column %) |
| **Symptom** | | | | | |
| Joint pain | 9 (30%) | 5 (45%) | 0 (0%) | 4 (24%) | 0.40 |
| Menopause-related symptom | 2 (6.7%) | 0 (0%) | 0 (0%) | 2 (12%) | 0.60 |
| Bleeding | 1 (3.3%) | 0 (0%) | 0 (0%) | 1 (5.9%) | 0.99 |
| Burning mouth | 1 (3.3%) | 1 (9.1%) | 0 (0%) | 0 (0%) | 0.40 |
| Drug-drug interactions | 1 (3.3%) | 0 (0%) | 0 (0%) | 1 (5.9%) | 0.99 |
| Hair loss | 1 (3.3%) | 0 (0%) | 0 (0%) | 1 (5.9%) | 0.99 |
| Nonadherence to treatment | 1 (3.3%) | 0 (0%) | 0 (0%) | 1 (5.9%) | 0.99 |
| Osteopenia | 1 (3.3%) | 0 (0%) | 0 (0%) | 1 (5.9%) | 0.99 |
| Paget's disease | 1 (3.3%) | 1 (9.1%) | 0 (0%) | 0 (0%) | 0.40 |
| Weight gain | 1 (3.3%) | 0 (0%) | 0 (0%) | 1 (5.9%) | 0.99 |
| Unspecified side effects | 11 (37%) | 3 (27%) | 0 (0%) | 8 (47%) | 0.40 |
| Unknown | 7 (23%) | 2 (18%) | 2 (100%) | 3 (18%) | 0.08 |
| **Usage of ET agent** | | | | | |
| Anastrozole (AI) | 11 (37%) | 7 (64%) | 0 (0%) | 4 (24%) | 0.05 |
| Exemestane (AI) | 11 (37%) | 6 (55%) | 0 (0%) | 5 (29%) | 0.30 |
| Letrozole (AI) | 21 (70%) | 7 (64%) | 0 (0%) | 14 (82%) | 0.05 |
| Tamoxifen (SERM) | 19 (63%) | 0 (0%) | 2 (100%) | 17 (100%) | <0.001 |
| Toremifene (SERM) | 1 (3.3%) | 0 (0%) | 0 (0%) | 1 (5.9%) | 0.99 |
| Fulvestrant (SERD) | 1 (3.3%) | 1 (9.1%) | 0 (0%) | 0 (0%) | 0.40 |
| **Total duration of ET** | | | | | |
| <2 years | 5 (17%) | 3 (27%) | 2 (12%) | 0 (0%) | 0.80 |
| 2-5 years | 11 (37%) | 3 (27%) | 7 (41%) | 1 (50%) |
| 5+ years | 14 (47%) | 5 (45%) | 8 (47%) | 1 (50%) |

a AI-only: AI (n=10), AI→SERD (n=1)

b SERM-only: SERM (n=2)

c AI+SERM: AI→SERM (n=6), AI→SERM→AI (n=2), SERM→AI (n=6), SERM→AI→SERM (n=2), SERM→AI→SERM→AI (n=1)

**Table S6**. Multivariable Cox proportional hazards models for time-to-switch with interaction between baseline gene expression and initial endocrine therapy

| **Gene** | **Initial endocrine therapy type** | **Hazard ratio (95% CI)** | **P value (raw)** | **P value (adjusted)** |
| --- | --- | --- | --- | --- |
| *TP53* | AI-initiated | 0.85 (0.55, 1.3) | 0.4532 | 0.8247 |
| SERM-initiated | 1.04 (0.5, 2.15) | 0.9140 | 0.9914 |
| Interaction | 1.23 (0.51, 2.94) | 0.6494 | 0.9228 |
| *WNT7B* | AI-initiated | 1.29 (0.75, 2.22) | 0.3611 | 0.7620 |
| SERM-initiated | 1.45 (0.58, 3.62) | 0.4201 | 0.7870 |
| Interaction | 1.13 (0.38, 3.32) | 0.8260 | 0.9554 |
| *UBE2T* | AI-initiated | 0.92 (0.5, 1.68) | 0.7759 | 0.9550 |
| SERM-initiated | 1.22 (0.53, 2.84) | 0.6384 | 0.9228 |
| Interaction | 1.34 (0.5, 3.55) | 0.5611 | 0.9011 |
| *BAG1* | AI-initiated | 0.89 (0.67, 1.17) | 0.3959 | 0.7739 |
| SERM-initiated | 0.37 (0.1, 1.31) | 0.1233 | 0.5627 |
| Interaction | 0.42 (0.12, 1.51) | 0.1824 | 0.6145 |
| *ACTR3B* | AI-initiated | 1.35 (0.78, 2.34) | 0.2836 | 0.7390 |
| SERM-initiated | 0.44 (0.18, 1.07) | 0.0696 | 0.5237 |
| Interaction | 0.33 (0.11, 0.93) | 0.0352 | 0.4182 |
| *PIK3R5* | AI-initiated | 1.4 (0.61, 3.23) | 0.4277 | 0.7948 |
| SERM-initiated | 1.59 (0.69, 3.67) | 0.2769 | 0.7334 |
| Interaction | 1.13 (0.31, 4.09) | 0.8470 | 0.9657 |
| *MELK* | AI-initiated | 1.1 (0.66, 1.83) | 0.7148 | 0.9336 |
| SERM-initiated | 1.13 (0.64, 2.01) | 0.6690 | 0.9265 |
| Interaction | 1.03 (0.51, 2.08) | 0.9334 | 0.9929 |
| *CCND1* | AI-initiated | 1 (0.44, 2.28) | 0.9955 | 0.9981 |
| SERM-initiated | 0.89 (0.62, 1.29) | 0.5453 | 0.9011 |
| Interaction | 0.89 (0.34, 2.35) | 0.8209 | 0.9554 |
| *MMP11* | AI-initiated | 0.84 (0.47, 1.51) | 0.5601 | 0.9011 |
| SERM-initiated | 1.5 (0.74, 3.04) | 0.2589 | 0.7167 |
| Interaction | 1.79 (0.81, 3.95) | 0.1502 | 0.5683 |
| *MAPT* | AI-initiated | 0.88 (0.55, 1.41) | 0.5984 | 0.9046 |
| SERM-initiated | 1.11 (0.58, 2.16) | 0.7482 | 0.9435 |
| Interaction | 1.27 (0.52, 3.08) | 0.6039 | 0.9095 |
| *KRT17* | AI-initiated | 1.1 (0.81, 1.5) | 0.5527 | 0.9011 |
| SERM-initiated | 1.08 (0.69, 1.71) | 0.7314 | 0.9377 |
| Interaction | 0.99 (0.56, 1.73) | 0.9628 | 0.9929 |
| *FOXA1* | AI-initiated | 0.99 (0.64, 1.52) | 0.9525 | 0.9929 |
| SERM-initiated | 1.15 (0.63, 2.09) | 0.6512 | 0.9228 |
| Interaction | 1.16 (0.57, 2.37) | 0.6780 | 0.9265 |
| *BRCA1* | AI-initiated | 0.96 (0.73, 1.28) | 0.8034 | 0.9554 |
| SERM-initiated | 0.97 (0.41, 2.29) | 0.9404 | 0.9929 |
| Interaction | 1 (0.38, 2.64) | 0.9947 | 0.9981 |
| *IGF1* | AI-initiated | 0.87 (0.43, 1.76) | 0.6918 | 0.9288 |
| SERM-initiated | 0.87 (0.54, 1.4) | 0.5613 | 0.9011 |
| Interaction | 1 (0.4, 2.52) | 0.9996 | 0.9996 |
| *CDC6* | AI-initiated | 0.71 (0.32, 1.58) | 0.4059 | 0.7757 |
| SERM-initiated | 1.73 (0.86, 3.49) | 0.1274 | 0.5627 |
| Interaction | 2.42 (0.84, 6.95) | 0.0999 | 0.5370 |
| *ITPR1* | AI-initiated | 0.85 (0.33, 2.14) | 0.7235 | 0.9377 |
| SERM-initiated | 0.26 (0.11, 0.59) | 0.0014 | 0.0608 |
| Interaction | 0.3 (0.08, 1.14) | 0.0784 | 0.5358 |
| *UBE2C* | AI-initiated | 1.08 (0.68, 1.72) | 0.7482 | 0.9435 |
| SERM-initiated | 1.34 (0.74, 2.45) | 0.3321 | 0.7501 |
| Interaction | 1.25 (0.6, 2.57) | 0.5516 | 0.9011 |
| *MKI67* | AI-initiated | 1.19 (0.81, 1.75) | 0.3830 | 0.7717 |
| SERM-initiated | 1.37 (0.79, 2.38) | 0.2603 | 0.7167 |
| Interaction | 1.16 (0.59, 2.28) | 0.6768 | 0.9265 |
| *CDCA1* | AI-initiated | 0.73 (0.4, 1.33) | 0.3025 | 0.7390 |
| SERM-initiated | 1.27 (0.79, 2.07) | 0.3264 | 0.7462 |
| Interaction | 1.74 (0.93, 3.28) | 0.0844 | 0.5358 |
| *MYBL2* | AI-initiated | 0.73 (0.4, 1.31) | 0.2850 | 0.7390 |
| SERM-initiated | 0.94 (0.5, 1.76) | 0.8503 | 0.9657 |
| Interaction | 1.3 (0.54, 3.11) | 0.5613 | 0.9011 |
| *PSPHL* | AI-initiated | 0.55 (0.3, 1.04) | 0.0654 | 0.5128 |
| SERM-initiated | 0.8 (0.57, 1.13) | 0.2040 | 0.6457 |
| Interaction | 1.44 (0.7, 3) | 0.3228 | 0.7462 |
| *TP63* | AI-initiated | 1.07 (0.94, 1.22) | 0.2740 | 0.7334 |
| SERM-initiated | 1.57 (0.32, 7.86) | 0.5796 | 0.9011 |
| Interaction | 1.47 (0.3, 7.25) | 0.6396 | 0.9228 |
| *ANLN* | AI-initiated | 1.37 (0.83, 2.25) | 0.2172 | 0.6643 |
| SERM-initiated | 1.29 (0.76, 2.2) | 0.3470 | 0.7588 |
| Interaction | 0.94 (0.46, 1.93) | 0.8735 | 0.9694 |
| *MTOR* | AI-initiated | 0.87 (0.61, 1.26) | 0.4694 | 0.8307 |
| SERM-initiated | 1.32 (0.71, 2.47) | 0.3822 | 0.7717 |
| Interaction | 1.51 (0.73, 3.12) | 0.2650 | 0.7167 |
| *KRT14* | AI-initiated | 1.1 (0.96, 1.25) | 0.1628 | 0.5897 |
| SERM-initiated | 2.12 (0.46, 9.84) | 0.3369 | 0.7522 |
| Interaction | 1.93 (0.42, 8.87) | 0.3970 | 0.7739 |
| *CEP55* | AI-initiated | 0.91 (0.57, 1.45) | 0.6845 | 0.9288 |
| SERM-initiated | 1.87 (1.06, 3.29) | 0.0308 | 0.4075 |
| Interaction | 2.05 (1.04, 4.05) | 0.0373 | 0.4182 |
| *WNT11* | AI-initiated | 2.26 (1, 5.11) | 0.0511 | 0.4562 |
| SERM-initiated | 0.35 (0.09, 1.39) | 0.1345 | 0.5627 |
| Interaction | 0.15 (0.03, 0.81) | 0.0273 | 0.3973 |
| *PIK3R2* | AI-initiated | 0.72 (0.37, 1.41) | 0.3389 | 0.7522 |
| SERM-initiated | 0.45 (0.21, 0.98) | 0.0433 | 0.4562 |
| Interaction | 0.63 (0.24, 1.63) | 0.3370 | 0.7522 |
| *CDCA8* | AI-initiated | 0.97 (0.56, 1.7) | 0.9231 | 0.9929 |
| SERM-initiated | 1.21 (0.63, 2.34) | 0.5685 | 0.9011 |
| Interaction | 1.24 (0.56, 2.78) | 0.5931 | 0.9046 |
| *ORC6L* | AI-initiated | 0.86 (0.38, 1.92) | 0.7076 | 0.9310 |
| SERM-initiated | 1.05 (0.73, 1.51) | 0.8101 | 0.9554 |
| Interaction | 1.22 (0.55, 2.73) | 0.6275 | 0.9228 |
| *GRB7* | AI-initiated | 1.14 (0.73, 1.79) | 0.5611 | 0.9011 |
| SERM-initiated | 0.66 (0.4, 1.09) | 0.1039 | 0.5370 |
| Interaction | 0.58 (0.27, 1.21) | 0.1453 | 0.5627 |
| *KIF2C* | AI-initiated | 1.05 (0.56, 1.97) | 0.8685 | 0.9694 |
| SERM-initiated | 1.28 (0.73, 2.23) | 0.3944 | 0.7739 |
| Interaction | 1.21 (0.58, 2.54) | 0.6149 | 0.9156 |
| *TMEM45B* | AI-initiated | 1.51 (1.09, 2.1) | 0.0144 | 0.3073 |
| SERM-initiated | 0.92 (0.71, 1.2) | 0.5380 | 0.9011 |
| Interaction | 0.61 (0.39, 0.95) | 0.0279 | 0.3973 |
| *CENPF* | AI-initiated | 1.01 (0.64, 1.57) | 0.9808 | 0.9946 |
| SERM-initiated | 1.79 (0.97, 3.31) | 0.0632 | 0.5128 |
| Interaction | 1.78 (0.87, 3.65) | 0.1150 | 0.5589 |
| *RRM2* | AI-initiated | 1.15 (0.76, 1.75) | 0.5033 | 0.8706 |
| SERM-initiated | 1.91 (1.01, 3.6) | 0.0459 | 0.4562 |
| Interaction | 1.65 (0.8, 3.43) | 0.1758 | 0.6060 |
| *CD8A* | AI-initiated | 0.67 (0.31, 1.44) | 0.3078 | 0.7434 |
| SERM-initiated | 1.01 (0.65, 1.55) | 0.9734 | 0.9929 |
| Interaction | 1.5 (0.6, 3.75) | 0.3853 | 0.7717 |
| *APOE* | AI-initiated | 1.07 (0.63, 1.82) | 0.8090 | 0.9554 |
| SERM-initiated | 1.02 (0.49, 2.1) | 0.9635 | 0.9929 |
| Interaction | 0.95 (0.37, 2.44) | 0.9191 | 0.9929 |
| *CXXC5* | AI-initiated | 0.72 (0.28, 1.84) | 0.4965 | 0.8626 |
| SERM-initiated | 0.55 (0.29, 1.05) | 0.0712 | 0.5245 |
| Interaction | 0.77 (0.21, 2.86) | 0.6916 | 0.9288 |
| *HMGA2* | AI-initiated | 0.62 (0.35, 1.11) | 0.1063 | 0.5370 |
| SERM-initiated | 0.61 (0.36, 1.03) | 0.0648 | 0.5128 |
| Interaction | 0.98 (0.41, 2.31) | 0.9576 | 0.9929 |
| *CDH3* | AI-initiated | 0.99 (0.63, 1.56) | 0.9637 | 0.9929 |
| SERM-initiated | 1.06 (0.63, 1.77) | 0.8199 | 0.9554 |
| Interaction | 1.07 (0.51, 2.25) | 0.8521 | 0.9657 |
| *FGFR3* | AI-initiated | 1.12 (0.7, 1.81) | 0.6325 | 0.9228 |
| SERM-initiated | 0.43 (0.16, 1.15) | 0.0923 | 0.5370 |
| Interaction | 0.38 (0.13, 1.14) | 0.0849 | 0.5358 |
| *TOP2A* | AI-initiated | 1.08 (0.65, 1.81) | 0.7630 | 0.9482 |
| SERM-initiated | 1.32 (0.78, 2.25) | 0.3028 | 0.7390 |
| Interaction | 1.22 (0.61, 2.43) | 0.5671 | 0.9011 |
| *WNT5A* | AI-initiated | 0.87 (0.53, 1.44) | 0.5963 | 0.9046 |
| SERM-initiated | 1.43 (0.89, 2.32) | 0.1403 | 0.5627 |
| Interaction | 1.64 (0.85, 3.16) | 0.1394 | 0.5627 |
| *BIRC5* | AI-initiated | 0.68 (0.4, 1.13) | 0.1352 | 0.5627 |
| SERM-initiated | 1.32 (0.74, 2.38) | 0.3478 | 0.7588 |
| Interaction | 1.96 (0.92, 4.19) | 0.0824 | 0.5358 |
| *TFF1* | AI-initiated | 1.14 (0.62, 2.09) | 0.6740 | 0.9265 |
| SERM-initiated | 1.63 (1.09, 2.44) | 0.0176 | 0.3386 |
| Interaction | 1.43 (0.66, 3.11) | 0.3655 | 0.7627 |
| *KNTC2* | AI-initiated | 0.85 (0.38, 1.94) | 0.7057 | 0.9310 |
| SERM-initiated | 1.52 (0.93, 2.51) | 0.0960 | 0.5370 |
| Interaction | 1.79 (0.75, 4.25) | 0.1903 | 0.6355 |
| *SYTL4* | AI-initiated | 0.42 (0.21, 0.83) | 0.0125 | 0.3073 |
| SERM-initiated | 1.08 (0.59, 1.98) | 0.8088 | 0.9554 |
| Interaction | 2.59 (1.06, 6.36) | 0.0372 | 0.4182 |
| *MIA* | AI-initiated | 0.6 (0.29, 1.21) | 0.1510 | 0.5683 |
| SERM-initiated | 1.19 (0.71, 1.98) | 0.5146 | 0.8862 |
| Interaction | 1.99 (0.83, 4.75) | 0.1212 | 0.5627 |
| *VRD* | AI-initiated | 0.54 (0.18, 1.6) | 0.2650 | 0.7167 |
| SERM-initiated | 1.79 (0.51, 6.23) | 0.3595 | 0.7620 |
| Interaction | 3.33 (0.69, 15.98) | 0.1334 | 0.5627 |
| *CDC20* | AI-initiated | 1.15 (0.7, 1.87) | 0.5821 | 0.9014 |
| SERM-initiated | 1.3 (0.77, 2.19) | 0.3214 | 0.7462 |
| Interaction | 1.14 (0.58, 2.24) | 0.7134 | 0.9336 |
| *CCNE1* | AI-initiated | 0.95 (0.62, 1.46) | 0.8136 | 0.9554 |
| SERM-initiated | 1.01 (0.52, 1.96) | 0.9708 | 0.9929 |
| Interaction | 1.07 (0.45, 2.5) | 0.8824 | 0.9694 |
| *EZH2* | AI-initiated | 1.28 (0.89, 1.83) | 0.1767 | 0.6060 |
| SERM-initiated | 1.17 (0.77, 1.8) | 0.4649 | 0.8307 |
| Interaction | 0.92 (0.53, 1.57) | 0.7494 | 0.9435 |
| *PRKCA* | AI-initiated | 1.04 (0.65, 1.65) | 0.8824 | 0.9694 |
| SERM-initiated | 0.89 (0.54, 1.47) | 0.6467 | 0.9228 |
| Interaction | 0.86 (0.43, 1.73) | 0.6672 | 0.9265 |
| *CCNB1* | AI-initiated | 1.19 (0.79, 1.79) | 0.4082 | 0.7760 |
| SERM-initiated | 1.45 (0.8, 2.66) | 0.2228 | 0.6643 |
| Interaction | 1.22 (0.61, 2.44) | 0.5689 | 0.9011 |
| *MDM2* | AI-initiated | 1.02 (0.58, 1.78) | 0.9482 | 0.9929 |
| SERM-initiated | 0.32 (0.12, 0.84) | 0.0212 | 0.3388 |
| Interaction | 0.32 (0.1, 1.03) | 0.0557 | 0.4822 |
| *PIK3R1* | AI-initiated | 2.01 (1.34, 3) | 0.0007 | 0.0442 |
| SERM-initiated | 0.64 (0.27, 1.47) | 0.2914 | 0.7390 |
| Interaction | 0.32 (0.12, 0.82) | 0.0173 | 0.3386 |
| *CD49* | AI-initiated | 0.86 (0.53, 1.39) | 0.5323 | 0.9011 |
| SERM-initiated | 1.15 (0.67, 1.96) | 0.6152 | 0.9156 |
| Interaction | 1.34 (0.59, 3.06) | 0.4897 | 0.8586 |
| *WNT4* | AI-initiated | 1.46 (0.8, 2.66) | 0.2223 | 0.6643 |
| SERM-initiated | 0.66 (0.36, 1.18) | 0.1623 | 0.5897 |
| Interaction | 0.45 (0.18, 1.16) | 0.0973 | 0.5370 |
| *ALDH1A1* | AI-initiated | 0.74 (0.48, 1.15) | 0.1818 | 0.6145 |
| SERM-initiated | 0.76 (0.43, 1.36) | 0.3612 | 0.7620 |
| Interaction | 1.03 (0.47, 2.23) | 0.9470 | 0.9929 |
| *WNT10A* | AI-initiated | 0.96 (0.71, 1.29) | 0.7664 | 0.9482 |
| SERM-initiated | 2.01 (0.97, 4.14) | 0.0587 | 0.4898 |
| Interaction | 2.1 (0.91, 4.88) | 0.0833 | 0.5358 |
| *ZEB2* | AI-initiated | 1.16 (0.62, 2.15) | 0.6434 | 0.9228 |
| SERM-initiated | 1.16 (0.67, 2.01) | 0.5896 | 0.9046 |
| Interaction | 1 (0.43, 2.37) | 0.9926 | 0.9981 |
| *WNT6* | AI-initiated | 0.37 (0.19, 0.73) | 0.0045 | 0.1428 |
| SERM-initiated | 1.25 (0.93, 1.68) | 0.1365 | 0.5627 |
| Interaction | 3.38 (1.67, 6.84) | 0.0007 | 0.0442 |
| *TYMS* | AI-initiated | 0.91 (0.55, 1.5) | 0.7074 | 0.9310 |
| SERM-initiated | 1.09 (0.66, 1.83) | 0.7289 | 0.9377 |
| Interaction | 1.2 (0.63, 2.31) | 0.5751 | 0.9011 |
| *KRT5* | AI-initiated | 1.08 (0.96, 1.23) | 0.1992 | 0.6457 |
| SERM-initiated | 1.56 (0.26, 9.39) | 0.6247 | 0.9226 |
| Interaction | 1.44 (0.25, 8.48) | 0.6854 | 0.9288 |
| *EXO1* | AI-initiated | 0.93 (0.56, 1.56) | 0.7916 | 0.9554 |
| SERM-initiated | 2.54 (1.4, 4.61) | 0.0022 | 0.0856 |
| Interaction | 2.72 (1.38, 5.37) | 0.0039 | 0.1355 |
| *PIK3CD* | AI-initiated | 0.89 (0.49, 1.62) | 0.7080 | 0.9310 |
| SERM-initiated | 1.31 (0.95, 1.81) | 0.1019 | 0.5370 |
| Interaction | 1.47 (0.71, 3.02) | 0.3002 | 0.7390 |
| *SP110* | AI-initiated | 0.84 (0.45, 1.57) | 0.5773 | 0.9011 |
| SERM-initiated | 1.76 (1.29, 2.4) | 0.0003 | 0.0440 |
| Interaction | 2.11 (1.07, 4.16) | 0.0321 | 0.4110 |
| *PIK3R3* | AI-initiated | 0.97 (0.64, 1.46) | 0.8835 | 0.9694 |
| SERM-initiated | 1.19 (0.81, 1.75) | 0.3806 | 0.7717 |
| Interaction | 1.23 (0.74, 2.03) | 0.4284 | 0.7948 |
| *FOXC1* | AI-initiated | 1.11 (0.91, 1.34) | 0.3041 | 0.7390 |
| SERM-initiated | 0.97 (0.39, 2.41) | 0.9442 | 0.9929 |
| Interaction | 0.88 (0.36, 2.11) | 0.7670 | 0.9482 |
| *PLCB1* | AI-initiated | 1.21 (0.97, 1.51) | 0.0955 | 0.5370 |
| SERM-initiated | 3.45 (1.44, 8.27) | 0.0055 | 0.1632 |
| Interaction | 2.85 (1.1, 7.37) | 0.0306 | 0.4075 |
| *CCND2* | AI-initiated | 0.71 (0.47, 1.07) | 0.1011 | 0.5370 |
| SERM-initiated | 0.8 (0.47, 1.39) | 0.4325 | 0.7984 |
| Interaction | 1.13 (0.54, 2.35) | 0.7431 | 0.9435 |
| *TWIST1* | AI-initiated | 0.66 (0.39, 1.1) | 0.1104 | 0.5507 |
| SERM-initiated | 0.68 (0.31, 1.51) | 0.3432 | 0.7574 |
| Interaction | 1.04 (0.41, 2.64) | 0.9417 | 0.9929 |
| *AKT3* | AI-initiated | 0.66 (0.41, 1.07) | 0.0893 | 0.5358 |
| SERM-initiated | 0.96 (0.62, 1.47) | 0.8423 | 0.9657 |
| Interaction | 1.44 (0.75, 2.79) | 0.2751 | 0.7334 |
| *PGR* | AI-initiated | 0.4 (0.11, 1.5) | 0.1752 | 0.6060 |
| SERM-initiated | 0.61 (0.29, 1.32) | 0.2100 | 0.6502 |
| Interaction | 1.53 (0.38, 6.17) | 0.5535 | 0.9011 |
| *THY1* | AI-initiated | 0.53 (0.23, 1.25) | 0.1465 | 0.5627 |
| SERM-initiated | 0.7 (0.44, 1.12) | 0.1396 | 0.5627 |
| Interaction | 1.31 (0.49, 3.55) | 0.5916 | 0.9046 |
| *CREBBP* | AI-initiated | 0.93 (0.56, 1.54) | 0.7850 | 0.9554 |
| SERM-initiated | 0.71 (0.44, 1.16) | 0.1734 | 0.6060 |
| Interaction | 0.77 (0.38, 1.56) | 0.4626 | 0.8307 |
| *VIM* | AI-initiated | 0.9 (0.49, 1.65) | 0.7324 | 0.9377 |
| SERM-initiated | 0.77 (0.51, 1.18) | 0.2291 | 0.6716 |
| Interaction | 0.86 (0.42, 1.76) | 0.6777 | 0.9265 |
| *MAPK10* | AI-initiated | 1.12 (0.72, 1.75) | 0.6186 | 0.9171 |
| SERM-initiated | 0.09 (0.01, 1.42) | 0.0872 | 0.5358 |
| Interaction | 0.08 (0.01, 1.25) | 0.0724 | 0.5245 |
| *STAT1* | AI-initiated | 0.83 (0.46, 1.51) | 0.5444 | 0.9011 |
| SERM-initiated | 2.45 (1.63, 3.69) | 0.0000 | 0.0063 |
| Interaction | 2.95 (1.55, 5.62) | 0.0010 | 0.0490 |
| *CLDN4 (claudin-4)* | AI-initiated | 1.19 (0.72, 1.98) | 0.4949 | 0.8626 |
| SERM-initiated | 0.83 (0.49, 1.39) | 0.4693 | 0.8307 |
| Interaction | 0.69 (0.35, 1.36) | 0.2851 | 0.7390 |
| *HGF* | AI-initiated | 0.95 (0.64, 1.41) | 0.7954 | 0.9554 |
| SERM-initiated | 1.11 (0.45, 2.74) | 0.8130 | 0.9554 |
| Interaction | 1.17 (0.4, 3.42) | 0.7679 | 0.9482 |
| *CLDN7 (claudin-7)* | AI-initiated | 1.13 (0.74, 1.74) | 0.5726 | 0.9011 |
| SERM-initiated | 0.96 (0.64, 1.43) | 0.8238 | 0.9554 |
| Interaction | 0.84 (0.47, 1.53) | 0.5747 | 0.9011 |
| *CD10* | AI-initiated | 0.97 (0.59, 1.6) | 0.9139 | 0.9914 |
| SERM-initiated | 0.81 (0.48, 1.35) | 0.4119 | 0.7791 |
| Interaction | 0.83 (0.45, 1.52) | 0.5454 | 0.9011 |
| *IGF1R* | AI-initiated | 1.06 (0.96, 1.19) | 0.2581 | 0.7167 |
| SERM-initiated | 0.76 (0.02, 23.4) | 0.8760 | 0.9694 |
| Interaction | 0.71 (0.02, 21.74) | 0.8473 | 0.9657 |
| *EGFR* | AI-initiated | 1.09 (0.71, 1.66) | 0.7007 | 0.9310 |
| SERM-initiated | 1.39 (1.19, 1.63) | 0.0000 | 0.0077 |
| Interaction | 1.28 (0.78, 2.09) | 0.3265 | 0.7462 |
| *EpCAM* | AI-initiated | 0.94 (0.59, 1.5) | 0.7876 | 0.9554 |
| SERM-initiated | 1.03 (0.7, 1.53) | 0.8735 | 0.9694 |
| Interaction | 1.1 (0.64, 1.9) | 0.7297 | 0.9377 |
| *WNT2* | AI-initiated | 0.74 (0.41, 1.35) | 0.3298 | 0.7494 |
| SERM-initiated | 0.92 (0.47, 1.82) | 0.8212 | 0.9554 |
| Interaction | 1.25 (0.48, 3.26) | 0.6555 | 0.9253 |
| *SNAI2* | AI-initiated | 0.52 (0.28, 0.99) | 0.0450 | 0.4562 |
| SERM-initiated | 0.74 (0.42, 1.29) | 0.2885 | 0.7390 |
| Interaction | 1.41 (0.63, 3.13) | 0.4033 | 0.7757 |
| *PIK3CG* | AI-initiated | 0.84 (0.45, 1.56) | 0.5776 | 0.9011 |
| SERM-initiated | 1.27 (0.71, 2.29) | 0.4177 | 0.7863 |
| Interaction | 1.52 (0.59, 3.94) | 0.3879 | 0.7717 |
| *CK8/18* | AI-initiated | 1.38 (0.85, 2.24) | 0.1985 | 0.6457 |
| SERM-initiated | 1.02 (0.53, 1.98) | 0.9425 | 0.9929 |
| Interaction | 0.74 (0.34, 1.65) | 0.4668 | 0.8307 |
| *PTEN* | AI-initiated | 0.96 (0.61, 1.51) | 0.8562 | 0.9670 |
| SERM-initiated | 1.31 (0.79, 2.18) | 0.3007 | 0.7390 |
| Interaction | 1.37 (0.71, 2.64) | 0.3530 | 0.7615 |
| *ERBB2* | AI-initiated | 1.14 (0.6, 2.16) | 0.6869 | 0.9288 |
| SERM-initiated | 0.47 (0.19, 1.17) | 0.1059 | 0.5370 |
| Interaction | 0.42 (0.11, 1.56) | 0.1923 | 0.6365 |
| *CD24* | AI-initiated | 1.07 (0.48, 2.38) | 0.8715 | 0.9694 |
| SERM-initiated | 1.13 (0.85, 1.5) | 0.3991 | 0.7739 |
| Interaction | 1.06 (0.48, 2.31) | 0.8879 | 0.9714 |
| *CDH1* | AI-initiated | 0.55 (0.34, 0.89) | 0.0142 | 0.3073 |
| SERM-initiated | 0.75 (0.52, 1.1) | 0.1427 | 0.5627 |
| Interaction | 1.38 (0.8, 2.37) | 0.2479 | 0.7082 |
| *SNAI1* | AI-initiated | 1.09 (0.74, 1.59) | 0.6684 | 0.9265 |
| SERM-initiated | 0.75 (0.36, 1.57) | 0.4506 | 0.8239 |
| Interaction | 0.69 (0.31, 1.53) | 0.3653 | 0.7627 |
| *CLDN3 (claudin-3)* | AI-initiated | 0.7 (0.49, 1) | 0.0507 | 0.4562 |
| SERM-initiated | 1.27 (0.67, 2.41) | 0.4656 | 0.8307 |
| Interaction | 1.81 (0.91, 3.63) | 0.0927 | 0.5370 |
| *BLVRA* | AI-initiated | 1.38 (1.05, 1.81) | 0.0210 | 0.3388 |
| SERM-initiated | 2.15 (1.21, 3.82) | 0.0091 | 0.2506 |
| Interaction | 1.56 (0.79, 3.09) | 0.2002 | 0.6457 |
| *SFRP1* | AI-initiated | 0.81 (0.56, 1.2) | 0.2954 | 0.7390 |
| SERM-initiated | 0.77 (0.42, 1.41) | 0.3899 | 0.7717 |
| Interaction | 0.94 (0.46, 1.9) | 0.8624 | 0.9694 |
| *MYC* | AI-initiated | 0.73 (0.39, 1.35) | 0.3100 | 0.7434 |
| SERM-initiated | 0.74 (0.37, 1.47) | 0.3897 | 0.7717 |
| Interaction | 1.02 (0.44, 2.34) | 0.9659 | 0.9929 |
| *IFT140* | AI-initiated | 1.04 (0.8, 1.34) | 0.7842 | 0.9554 |
| SERM-initiated | 0.67 (0.4, 1.13) | 0.1356 | 0.5627 |
| Interaction | 0.65 (0.35, 1.21) | 0.1727 | 0.6060 |
| *PTTG1* | AI-initiated | 1.16 (0.67, 2.04) | 0.5941 | 0.9046 |
| SERM-initiated | 1.69 (0.94, 3.05) | 0.0820 | 0.5358 |
| Interaction | 1.45 (0.7, 3.01) | 0.3170 | 0.7462 |
| *NAT1* | AI-initiated | 1.26 (0.94, 1.69) | 0.1268 | 0.5627 |
| SERM-initiated | 0.91 (0.47, 1.77) | 0.7852 | 0.9554 |
| Interaction | 0.73 (0.38, 1.38) | 0.3258 | 0.7462 |
| *GPR160* | AI-initiated | 1.3 (0.93, 1.8) | 0.1234 | 0.5627 |
| SERM-initiated | 1.86 (0.86, 4.02) | 0.1166 | 0.5596 |
| Interaction | 1.43 (0.66, 3.13) | 0.3678 | 0.7633 |
| *WNT5B* | AI-initiated | 0.61 (0.31, 1.21) | 0.1575 | 0.5816 |
| SERM-initiated | 0.65 (0.31, 1.35) | 0.2484 | 0.7082 |
| Interaction | 1.06 (0.4, 2.77) | 0.9096 | 0.9914 |
| *PIK3CA* | AI-initiated | 0.81 (0.52, 1.27) | 0.3605 | 0.7620 |
| SERM-initiated | 0.79 (0.47, 1.33) | 0.3737 | 0.7716 |
| Interaction | 0.97 (0.51, 1.84) | 0.9327 | 0.9929 |
| *GSK3B* | AI-initiated | 0.8 (0.48, 1.33) | 0.3875 | 0.7717 |
| SERM-initiated | 1.65 (1.11, 2.47) | 0.0134 | 0.3073 |
| Interaction | 2.07 (1.12, 3.83) | 0.0198 | 0.3388 |
| *CRYBB2* | AI-initiated | 1.09 (0.63, 1.88) | 0.7602 | 0.9482 |
| SERM-initiated | 1.79 (0.91, 3.52) | 0.0891 | 0.5358 |
| Interaction | 1.65 (0.72, 3.79) | 0.2393 | 0.6962 |
| *MUC1* | AI-initiated | 1.27 (0.84, 1.92) | 0.2490 | 0.7082 |
| SERM-initiated | 2.66 (0.93, 7.59) | 0.0672 | 0.5165 |
| Interaction | 2.09 (0.66, 6.58) | 0.2083 | 0.6502 |
| *CD44* | AI-initiated | 1.16 (0.69, 1.94) | 0.5796 | 0.9011 |
| SERM-initiated | 1 (0.51, 1.98) | 0.9902 | 0.9981 |
| Interaction | 0.87 (0.37, 2.05) | 0.7470 | 0.9435 |
| *SFRP2* | AI-initiated | 0.64 (0.4, 1.05) | 0.0755 | 0.5358 |
| SERM-initiated | 0.66 (0.37, 1.19) | 0.1646 | 0.5906 |
| Interaction | 1.03 (0.45, 2.32) | 0.9504 | 0.9929 |
| *CD29* | AI-initiated | 0.39 (0.16, 0.95) | 0.0373 | 0.4182 |
| SERM-initiated | 0.73 (0.45, 1.21) | 0.2251 | 0.6649 |
| Interaction | 1.89 (0.63, 5.63) | 0.2554 | 0.7167 |
| *BCL2* | AI-initiated | 0.63 (0.37, 1.07) | 0.0854 | 0.5358 |
| SERM-initiated | 0.96 (0.6, 1.55) | 0.8694 | 0.9694 |
| Interaction | 1.52 (0.67, 3.45) | 0.3117 | 0.7434 |
| *CD27* | AI-initiated | 0.71 (0.4, 1.24) | 0.2232 | 0.6643 |
| SERM-initiated | 1.39 (1.05, 1.85) | 0.0235 | 0.3615 |
| Interaction | 1.97 (1.01, 3.86) | 0.0467 | 0.4562 |
| *MLPH* | AI-initiated | 1.14 (0.65, 1.99) | 0.6501 | 0.9228 |
| SERM-initiated | 0.61 (0.31, 1.2) | 0.1541 | 0.5747 |
| Interaction | 0.54 (0.2, 1.45) | 0.2197 | 0.6643 |
| *TWIST2* | AI-initiated | 0.97 (0.75, 1.26) | 0.8222 | 0.9554 |
| SERM-initiated | 0.77 (0.41, 1.44) | 0.4060 | 0.7757 |
| Interaction | 0.79 (0.43, 1.45) | 0.4453 | 0.8181 |
| *LEF1* | AI-initiated | 1.04 (0.81, 1.35) | 0.7556 | 0.9482 |
| SERM-initiated | 1.2 (0.59, 2.46) | 0.6140 | 0.9156 |
| Interaction | 1.15 (0.59, 2.27) | 0.6771 | 0.9265 |
| *SLC39A6* | AI-initiated | 1.09 (0.48, 2.47) | 0.8401 | 0.9657 |
| SERM-initiated | 0.93 (0.67, 1.28) | 0.6501 | 0.9228 |
| Interaction | 0.85 (0.38, 1.92) | 0.7014 | 0.9310 |
| *WDR77* | AI-initiated | 0.88 (0.59, 1.32) | 0.5363 | 0.9011 |
| SERM-initiated | 0.99 (0.37, 2.63) | 0.9816 | 0.9946 |
| Interaction | 1.12 (0.41, 3.1) | 0.8237 | 0.9554 |
| *PHGDH* | AI-initiated | 0.9 (0.57, 1.41) | 0.6359 | 0.9228 |
| SERM-initiated | 0.98 (0.55, 1.74) | 0.9481 | 0.9929 |
| Interaction | 1.09 (0.54, 2.21) | 0.8030 | 0.9554 |
| *BORCS7* | AI-initiated | 0.77 (0.54, 1.09) | 0.1409 | 0.5627 |
| SERM-initiated | 1.49 (0.67, 3.31) | 0.3228 | 0.7462 |
| Interaction | 1.94 (0.8, 4.75) | 0.1441 | 0.5627 |
| *BCL2L1* | AI-initiated | 0.66 (0.43, 1.01) | 0.0565 | 0.4822 |
| SERM-initiated | 0.65 (0.38, 1.12) | 0.1241 | 0.5627 |
| Interaction | 0.99 (0.51, 1.92) | 0.9722 | 0.9929 |
| *EGF* | AI-initiated | 0.99 (0.66, 1.5) | 0.9748 | 0.9929 |
| SERM-initiated | 1.59 (0.87, 2.9) | 0.1316 | 0.5627 |
| Interaction | 1.6 (0.78, 3.29) | 0.2023 | 0.6457 |
| *FGFR4* | AI-initiated | 1.04 (0.82, 1.32) | 0.7326 | 0.9377 |
| SERM-initiated | 0.02 (0, 0.2) | 0.0008 | 0.0442 |
| Interaction | 0.02 (0, 0.2) | 0.0008 | 0.0442 |
| *GPC4* | AI-initiated | 1.34 (0.94, 1.9) | 0.1051 | 0.5370 |
| SERM-initiated | 1.37 (0.75, 2.49) | 0.3032 | 0.7390 |
| Interaction | 1.02 (0.52, 2) | 0.9466 | 0.9929 |
| *ZEB1* | AI-initiated | 0.6 (0.39, 0.92) | 0.0203 | 0.3388 |
| SERM-initiated | 0.64 (0.41, 1) | 0.0487 | 0.4562 |
| Interaction | 1.06 (0.57, 1.96) | 0.8526 | 0.9657 |
| *ITGB6* | AI-initiated | 1.65 (0.69, 3.93) | 0.2622 | 0.7167 |
| SERM-initiated | 0.51 (0.18, 1.45) | 0.2051 | 0.6457 |
| Interaction | 0.31 (0.07, 1.33) | 0.1137 | 0.5589 |
| *ESR1* | AI-initiated | 0.77 (0.44, 1.34) | 0.3516 | 0.7615 |
| SERM-initiated | 1.44 (0.51, 4.04) | 0.4892 | 0.8586 |
| Interaction | 1.88 (0.57, 6.2) | 0.3008 | 0.7390 |
| *SQLE* | AI-initiated | 0.43 (0.19, 0.95) | 0.0381 | 0.4182 |
| SERM-initiated | 0.9 (0.56, 1.45) | 0.6731 | 0.9265 |
| Interaction | 2.09 (1, 4.38) | 0.0500 | 0.4562 |

**Table S7**. Multivariable Cox proportional hazards models for time-to-switch with interaction between baseline gene expression and current endocrine therapy

| **Gene** | **Current endocrine therapy type** | **Hazard ratio (95% CI)** | **P value (raw)** | **P value (adjusted)** |
| --- | --- | --- | --- | --- |
| *TP53* | Currently on AI | 0.9 (0.61, 1.31) | 0.5663 | 0.7708 |
| Currently on SERM | 0.34 (0.09, 1.31) | 0.1173 | 0.3818 |
| Currently on SERM vs AI | 0.99 (0.42, 2.33) | 0.9774 | 0.9851 |
| *WNT7B* | Currently on AI | 1.46 (0.99, 2.16) | 0.0542 | 0.3585 |
| Currently on SERM | 0.46 (0.15, 1.41) | 0.1726 | 0.3971 |
| Currently on SERM vs AI | 0.68 (0.23, 2.01) | 0.4820 | 0.6880 |
| *UBE2T* | Currently on AI | 0.94 (0.57, 1.57) | 0.8249 | 0.9243 |
| Currently on SERM | 0.35 (0.1, 1.28) | 0.1123 | 0.3770 |
| Currently on SERM vs AI | 1.11 (0.41, 2.97) | 0.8373 | 0.9308 |
| *BAG1* | Currently on AI | 0.86 (0.63, 1.17) | 0.3295 | 0.5700 |
| Currently on SERM | 0.23 (0.06, 0.83) | 0.0243 | 0.2742 |
| Currently on SERM vs AI | 0.49 (0.17, 1.43) | 0.1907 | 0.4137 |
| *ACTR3B* | Currently on AI | 1.16 (0.71, 1.89) | 0.5663 | 0.7708 |
| Currently on SERM | 0.38 (0.09, 1.53) | 0.1727 | 0.3971 |
| Currently on SERM vs AI | 0.77 (0.36, 1.66) | 0.5090 | 0.7212 |
| *PIK3R5* | Currently on AI | 1.36 (0.68, 2.7) | 0.3842 | 0.6139 |
| Currently on SERM | 0.54 (0.1, 2.74) | 0.4548 | 0.6600 |
| Currently on SERM vs AI | 1.28 (0.67, 2.47) | 0.4551 | 0.6600 |
| *MELK* | Currently on AI | 1.1 (0.71, 1.7) | 0.6634 | 0.8244 |
| Currently on SERM | 0.39 (0.11, 1.34) | 0.1340 | 0.3850 |
| Currently on SERM vs AI | 1.02 (0.53, 1.99) | 0.9423 | 0.9738 |
| *CCND1* | Currently on AI | 0.92 (0.45, 1.86) | 0.8135 | 0.9239 |
| Currently on SERM | 0.34 (0.08, 1.44) | 0.1437 | 0.3850 |
| Currently on SERM vs AI | 1.09 (0.55, 2.18) | 0.8057 | 0.9191 |
| *MMP11* | Currently on AI | 1.13 (0.73, 1.75) | 0.5896 | 0.7862 |
| Currently on SERM | 0.4 (0.14, 1.16) | 0.0907 | 0.3614 |
| Currently on SERM vs AI | 0.61 (0.3, 1.25) | 0.1787 | 0.4013 |
| *MAPT* | Currently on AI | 1.01 (0.68, 1.49) | 0.9716 | 0.9831 |
| Currently on SERM | 0.37 (0.1, 1.41) | 0.1472 | 0.3850 |
| Currently on SERM vs AI | 0.79 (0.41, 1.52) | 0.4855 | 0.6905 |
| *KRT17* | Currently on AI | 1.2 (0.92, 1.57) | 0.1721 | 0.3971 |
| Currently on SERM | 0.46 (0.12, 1.77) | 0.2565 | 0.4828 |
| Currently on SERM vs AI | 0.78 (0.49, 1.23) | 0.2850 | 0.5189 |
| *FOXA1* | Currently on AI | 0.98 (0.64, 1.5) | 0.9244 | 0.9732 |
| Currently on SERM | 0.37 (0.12, 1.21) | 0.1018 | 0.3688 |
| Currently on SERM vs AI | 1.23 (0.59, 2.55) | 0.5775 | 0.7781 |
| *BRCA1* | Currently on AI | 0.97 (0.75, 1.27) | 0.8450 | 0.9311 |
| Currently on SERM | 0.35 (0.1, 1.21) | 0.0969 | 0.3614 |
| Currently on SERM vs AI | 0.92 (0.4, 2.11) | 0.8473 | 0.9311 |
| *IGF1* | Currently on AI | 0.71 (0.42, 1.2) | 0.2001 | 0.4154 |
| Currently on SERM | 0.22 (0.05, 1.09) | 0.0638 | 0.3611 |
| Currently on SERM vs AI | 1.44 (0.82, 2.51) | 0.2014 | 0.4158 |
| *CDC6* | Currently on AI | 0.91 (0.48, 1.7) | 0.7554 | 0.8817 |
| Currently on SERM | 0.35 (0.1, 1.19) | 0.0940 | 0.3614 |
| Currently on SERM vs AI | 1.48 (0.61, 3.59) | 0.3907 | 0.6145 |
| *ITPR1* | Currently on AI | 0.66 (0.29, 1.48) | 0.3124 | 0.5529 |
| Currently on SERM | 0.2 (0.06, 0.69) | 0.0109 | 0.2742 |
| Currently on SERM vs AI | 0.42 (0.1, 1.82) | 0.2449 | 0.4633 |
| *UBE2C* | Currently on AI | 1.17 (0.78, 1.74) | 0.4483 | 0.6571 |
| Currently on SERM | 0.41 (0.12, 1.38) | 0.1505 | 0.3850 |
| Currently on SERM vs AI | 1 (0.5, 1.98) | 0.9952 | 0.9952 |
| *MKI67* | Currently on AI | 1.29 (0.91, 1.83) | 0.1528 | 0.3860 |
| Currently on SERM | 0.45 (0.14, 1.51) | 0.1966 | 0.4154 |
| Currently on SERM vs AI | 0.91 (0.47, 1.76) | 0.7759 | 0.9002 |
| *CDCA1* | Currently on AI | 0.79 (0.45, 1.38) | 0.4134 | 0.6350 |
| Currently on SERM | 0.31 (0.09, 1.07) | 0.0646 | 0.3611 |
| Currently on SERM vs AI | 1.39 (0.71, 2.73) | 0.3366 | 0.5797 |
| *MYBL2* | Currently on AI | 0.71 (0.42, 1.2) | 0.1968 | 0.4154 |
| Currently on SERM | 0.29 (0.08, 1.08) | 0.0644 | 0.3611 |
| Currently on SERM vs AI | 1.39 (0.66, 2.93) | 0.3855 | 0.6139 |
| *PSPHL* | Currently on AI | 0.56 (0.31, 1) | 0.0493 | 0.3585 |
| Currently on SERM | 0.24 (0.07, 0.79) | 0.0187 | 0.2742 |
| Currently on SERM vs AI | 1.52 (0.73, 3.15) | 0.2646 | 0.4956 |
| *TP63* | Currently on AI | 1.08 (0.95, 1.23) | 0.2268 | 0.4398 |
| Currently on SERM | 0.39 (0.11, 1.36) | 0.1398 | 0.3850 |
| Currently on SERM vs AI | 1.03 (0.22, 4.74) | 0.9729 | 0.9831 |
| *ANLN* | Currently on AI | 1.65 (0.99, 2.73) | 0.0527 | 0.3585 |
| Currently on SERM | 0.53 (0.16, 1.74) | 0.2976 | 0.5340 |
| Currently on SERM vs AI | 0.62 (0.3, 1.29) | 0.2026 | 0.4160 |
| *MTOR* | Currently on AI | 0.87 (0.62, 1.22) | 0.4244 | 0.6493 |
| Currently on SERM | 0.3 (0.08, 1.12) | 0.0741 | 0.3613 |
| Currently on SERM vs AI | 1.54 (0.93, 2.56) | 0.0968 | 0.3614 |
| *KRT14* | Currently on AI | 1.09 (0.96, 1.24) | 0.1831 | 0.4048 |
| Currently on SERM | 0.39 (0.11, 1.33) | 0.1322 | 0.3850 |
| Currently on SERM vs AI | 2.09 (0.5, 8.77) | 0.3158 | 0.5538 |
| *CEP55* | Currently on AI | 1.19 (0.79, 1.81) | 0.4038 | 0.6252 |
| Currently on SERM | 0.43 (0.14, 1.36) | 0.1514 | 0.3850 |
| Currently on SERM vs AI | 1.03 (0.55, 1.91) | 0.9327 | 0.9732 |
| *WNT11* | Currently on AI | 2.06 (0.91, 4.69) | 0.0843 | 0.3614 |
| Currently on SERM | 0.6 (0.12, 3.13) | 0.5474 | 0.7561 |
| Currently on SERM vs AI | 0.26 (0.04, 1.6) | 0.1454 | 0.3850 |
| *PIK3R2* | Currently on AI | 0.64 (0.37, 1.11) | 0.1116 | 0.3770 |
| Currently on SERM | 0.2 (0.04, 0.97) | 0.0453 | 0.3515 |
| Currently on SERM vs AI | 0.96 (0.39, 2.35) | 0.9265 | 0.9732 |
| *CDCA8* | Currently on AI | 1.09 (0.67, 1.8) | 0.7222 | 0.8612 |
| Currently on SERM | 0.38 (0.11, 1.33) | 0.1312 | 0.3850 |
| Currently on SERM vs AI | 0.89 (0.44, 1.79) | 0.7455 | 0.8754 |
| *ORC6L* | Currently on AI | 0.89 (0.5, 1.6) | 0.7041 | 0.8503 |
| Currently on SERM | 0.33 (0.09, 1.17) | 0.0846 | 0.3614 |
| Currently on SERM vs AI | 1.19 (0.63, 2.22) | 0.5959 | 0.7890 |
| *GRB7* | Currently on AI | 1.03 (0.69, 1.55) | 0.8718 | 0.9457 |
| Currently on SERM | 0.33 (0.1, 1.1) | 0.0718 | 0.3611 |
| Currently on SERM vs AI | 0.65 (0.25, 1.68) | 0.3708 | 0.6090 |
| *KIF2C* | Currently on AI | 1.19 (0.68, 2.1) | 0.5395 | 0.7518 |
| Currently on SERM | 0.42 (0.13, 1.4) | 0.1589 | 0.3890 |
| Currently on SERM vs AI | 0.9 (0.46, 1.74) | 0.7444 | 0.8754 |
| *TMEM45B* | Currently on AI | 1.23 (0.87, 1.76) | 0.2406 | 0.4597 |
| Currently on SERM | 0.48 (0.13, 1.79) | 0.2757 | 0.5090 |
| Currently on SERM vs AI | 0.84 (0.52, 1.36) | 0.4817 | 0.6880 |
| *CENPF* | Currently on AI | 1.19 (0.76, 1.88) | 0.4471 | 0.6571 |
| Currently on SERM | 0.43 (0.14, 1.33) | 0.1414 | 0.3850 |
| Currently on SERM vs AI | 1.07 (0.53, 2.15) | 0.8487 | 0.9311 |
| *RRM2* | Currently on AI | 1.33 (0.9, 1.97) | 0.1496 | 0.3850 |
| Currently on SERM | 0.47 (0.15, 1.46) | 0.1907 | 0.4137 |
| Currently on SERM vs AI | 1.07 (0.58, 1.99) | 0.8264 | 0.9243 |
| *CD8A* | Currently on AI | 0.64 (0.36, 1.12) | 0.1189 | 0.3837 |
| Currently on SERM | 0.24 (0.06, 1.03) | 0.0542 | 0.3585 |
| Currently on SERM vs AI | 1.9 (1.02, 3.52) | 0.0423 | 0.3497 |
| *APOE* | Currently on AI | 1 (0.6, 1.67) | 0.9872 | 0.9898 |
| Currently on SERM | 0.36 (0.07, 1.84) | 0.2198 | 0.4381 |
| Currently on SERM vs AI | 1.16 (0.66, 2.05) | 0.6081 | 0.7969 |
| *CXXC5* | Currently on AI | 0.67 (0.35, 1.27) | 0.2202 | 0.4381 |
| Currently on SERM | 0.27 (0.07, 1.09) | 0.0667 | 0.3611 |
| Currently on SERM vs AI | 1.04 (0.52, 2.07) | 0.9077 | 0.9674 |
| *HMGA2* | Currently on AI | 0.64 (0.4, 1.05) | 0.0771 | 0.3613 |
| Currently on SERM | 0.22 (0.06, 0.76) | 0.0170 | 0.2742 |
| Currently on SERM vs AI | 0.89 (0.36, 2.18) | 0.7996 | 0.9166 |
| *CDH3* | Currently on AI | 1.22 (0.77, 1.92) | 0.3930 | 0.6145 |
| Currently on SERM | 0.47 (0.13, 1.62) | 0.2303 | 0.4421 |
| Currently on SERM vs AI | 0.64 (0.32, 1.29) | 0.2172 | 0.4366 |
| *FGFR3* | Currently on AI | 0.98 (0.61, 1.58) | 0.9485 | 0.9738 |
| Currently on SERM | 0.4 (0.1, 1.6) | 0.1936 | 0.4154 |
| Currently on SERM vs AI | 1.51 (0.71, 3.21) | 0.2785 | 0.5118 |
| *TOP2A* | Currently on AI | 1.22 (0.77, 1.95) | 0.4016 | 0.6243 |
| Currently on SERM | 0.43 (0.13, 1.46) | 0.1751 | 0.4002 |
| Currently on SERM vs AI | 0.92 (0.48, 1.73) | 0.7854 | 0.9030 |
| *WNT5A* | Currently on AI | 1.02 (0.7, 1.48) | 0.9285 | 0.9732 |
| Currently on SERM | 0.37 (0.1, 1.41) | 0.1448 | 0.3850 |
| Currently on SERM vs AI | 1.06 (0.4, 2.79) | 0.9119 | 0.9674 |
| *BIRC5* | Currently on AI | 0.85 (0.51, 1.44) | 0.5531 | 0.7612 |
| Currently on SERM | 0.32 (0.1, 1.02) | 0.0551 | 0.3585 |
| Currently on SERM vs AI | 1.18 (0.61, 2.27) | 0.6279 | 0.8065 |
| *TFF1* | Currently on AI | 1.29 (0.79, 2.1) | 0.3011 | 0.5353 |
| Currently on SERM | 0.5 (0.11, 2.2) | 0.3602 | 0.6016 |
| Currently on SERM vs AI | 1.11 (0.67, 1.83) | 0.6894 | 0.8433 |
| *KNTC2* | Currently on AI | 1.06 (0.59, 1.89) | 0.8517 | 0.9318 |
| Currently on SERM | 0.39 (0.12, 1.29) | 0.1230 | 0.3850 |
| Currently on SERM vs AI | 1.2 (0.6, 2.39) | 0.6107 | 0.7977 |
| *SYTL4* | Currently on AI | 0.49 (0.23, 1.07) | 0.0719 | 0.3611 |
| Currently on SERM | 0.17 (0.04, 0.63) | 0.0087 | 0.2742 |
| Currently on SERM vs AI | 2.38 (1.12, 5.06) | 0.0241 | 0.2742 |
| *MIA* | Currently on AI | 0.73 (0.41, 1.3) | 0.2851 | 0.5189 |
| Currently on SERM | 0.29 (0.08, 1.1) | 0.0679 | 0.3611 |
| Currently on SERM vs AI | 1.3 (0.64, 2.64) | 0.4605 | 0.6623 |
| *VRD* | Currently on AI | 1.1 (0.55, 2.22) | 0.7801 | 0.9007 |
| Currently on SERM | 0.35 (0.11, 1.1) | 0.0721 | 0.3611 |
| Currently on SERM vs AI | 0.28 (0.1, 0.78) | 0.0153 | 0.2742 |
| *CDC20* | Currently on AI | 1.35 (0.85, 2.14) | 0.1996 | 0.4154 |
| Currently on SERM | 0.46 (0.14, 1.54) | 0.2082 | 0.4221 |
| Currently on SERM vs AI | 0.79 (0.41, 1.49) | 0.4600 | 0.6623 |
| *CCNE1* | Currently on AI | 0.89 (0.6, 1.32) | 0.5701 | 0.7708 |
| Currently on SERM | 0.35 (0.11, 1.15) | 0.0847 | 0.3614 |
| Currently on SERM vs AI | 1.43 (0.69, 2.97) | 0.3415 | 0.5803 |
| *EZH2* | Currently on AI | 1.3 (0.92, 1.82) | 0.1337 | 0.3850 |
| Currently on SERM | 0.42 (0.13, 1.33) | 0.1399 | 0.3850 |
| Currently on SERM vs AI | 0.89 (0.5, 1.59) | 0.7020 | 0.8503 |
| *PRKCA* | Currently on AI | 0.89 (0.56, 1.43) | 0.6328 | 0.8073 |
| Currently on SERM | 0.31 (0.07, 1.34) | 0.1161 | 0.3810 |
| Currently on SERM vs AI | 1.16 (0.61, 2.21) | 0.6477 | 0.8158 |
| *CCNB1* | Currently on AI | 1.38 (0.92, 2.06) | 0.1199 | 0.3838 |
| Currently on SERM | 0.45 (0.14, 1.41) | 0.1700 | 0.3971 |
| Currently on SERM vs AI | 0.83 (0.41, 1.64) | 0.5862 | 0.7843 |
| *MDM2* | Currently on AI | 0.81 (0.46, 1.41) | 0.4555 | 0.6600 |
| Currently on SERM | 0.37 (0.1, 1.46) | 0.1558 | 0.3884 |
| Currently on SERM vs AI | 1.86 (0.61, 5.66) | 0.2737 | 0.5077 |
| *PIK3R1* | Currently on AI | 1.56 (1.01, 2.42) | 0.0442 | 0.3515 |
| Currently on SERM | 0.57 (0.14, 2.38) | 0.4396 | 0.6552 |
| Currently on SERM vs AI | 0.62 (0.35, 1.12) | 0.1129 | 0.3770 |
| *CD49* | Currently on AI | 0.85 (0.56, 1.28) | 0.4298 | 0.6523 |
| Currently on SERM | 0.28 (0.07, 1.08) | 0.0641 | 0.3611 |
| Currently on SERM vs AI | 1.49 (0.83, 2.65) | 0.1785 | 0.4013 |
| *WNT4* | Currently on AI | 0.98 (0.55, 1.77) | 0.9537 | 0.9740 |
| Currently on SERM | 0.36 (0.09, 1.44) | 0.1488 | 0.3850 |
| Currently on SERM vs AI | 1.03 (0.58, 1.83) | 0.9120 | 0.9674 |
| *ALDH1A1* | Currently on AI | 0.63 (0.38, 1.03) | 0.0630 | 0.3611 |
| Currently on SERM | 0.22 (0.06, 0.89) | 0.0334 | 0.3374 |
| Currently on SERM vs AI | 1.52 (0.77, 2.98) | 0.2281 | 0.4402 |
| *WNT10A* | Currently on AI | 0.93 (0.68, 1.27) | 0.6517 | 0.8178 |
| Currently on SERM | 0.27 (0.07, 0.96) | 0.0426 | 0.3497 |
| Currently on SERM vs AI | 2.88 (1.44, 5.77) | 0.0028 | 0.2727 |
| *ZEB2* | Currently on AI | 0.98 (0.55, 1.76) | 0.9511 | 0.9739 |
| Currently on SERM | 0.31 (0.06, 1.51) | 0.1477 | 0.3850 |
| Currently on SERM vs AI | 1.46 (0.82, 2.58) | 0.1995 | 0.4154 |
| *WNT6* | Currently on AI | 0.38 (0.18, 0.81) | 0.0130 | 0.2742 |
| Currently on SERM | 0.26 (0.09, 0.8) | 0.0191 | 0.2742 |
| Currently on SERM vs AI | 3.85 (1.66, 8.89) | 0.0016 | 0.2078 |
| *TYMS* | Currently on AI | 0.93 (0.57, 1.52) | 0.7810 | 0.9007 |
| Currently on SERM | 0.35 (0.09, 1.27) | 0.1104 | 0.3770 |
| Currently on SERM vs AI | 1.13 (0.59, 2.16) | 0.7144 | 0.8600 |
| *KRT5* | Currently on AI | 1.09 (0.96, 1.23) | 0.1977 | 0.4154 |
| Currently on SERM | 0.39 (0.11, 1.34) | 0.1362 | 0.3850 |
| Currently on SERM vs AI | 1.31 (0.24, 7.11) | 0.7530 | 0.8816 |
| *EXO1* | Currently on AI | 1.13 (0.7, 1.85) | 0.6140 | 0.7992 |
| Currently on SERM | 0.39 (0.13, 1.12) | 0.0797 | 0.3614 |
| Currently on SERM vs AI | 1.33 (0.66, 2.67) | 0.4261 | 0.6493 |
| *PIK3CD* | Currently on AI | 0.89 (0.58, 1.36) | 0.5994 | 0.7910 |
| Currently on SERM | 0.27 (0.06, 1.15) | 0.0771 | 0.3613 |
| Currently on SERM vs AI | 1.69 (1.02, 2.79) | 0.0423 | 0.3497 |
| *SP110* | Currently on AI | 1.13 (0.71, 1.79) | 0.6179 | 0.8016 |
| Currently on SERM | 0.35 (0.1, 1.19) | 0.0927 | 0.3614 |
| Currently on SERM vs AI | 1.48 (0.87, 2.53) | 0.1472 | 0.3850 |
| *PIK3R3* | Currently on AI | 1.04 (0.7, 1.56) | 0.8387 | 0.9308 |
| Currently on SERM | 0.38 (0.1, 1.37) | 0.1383 | 0.3850 |
| Currently on SERM vs AI | 1.08 (0.58, 2) | 0.8066 | 0.9191 |
| *FOXC1* | Currently on AI | 1.1 (0.89, 1.35) | 0.3711 | 0.6090 |
| Currently on SERM | 0.41 (0.12, 1.47) | 0.1708 | 0.3971 |
| Currently on SERM vs AI | 0.93 (0.47, 1.85) | 0.8280 | 0.9243 |
| *PLCB1* | Currently on AI | 1.17 (0.93, 1.48) | 0.1723 | 0.3971 |
| Currently on SERM | 0.33 (0.11, 1.02) | 0.0536 | 0.3585 |
| Currently on SERM vs AI | 1.67 (1.16, 2.41) | 0.0060 | 0.2742 |
| *CCND2* | Currently on AI | 0.69 (0.46, 1.03) | 0.0694 | 0.3611 |
| Currently on SERM | 0.25 (0.07, 0.91) | 0.0361 | 0.3466 |
| Currently on SERM vs AI | 1.27 (0.58, 2.78) | 0.5423 | 0.7518 |
| *TWIST1* | Currently on AI | 0.59 (0.35, 1.01) | 0.0567 | 0.3611 |
| Currently on SERM | 0.21 (0.06, 0.79) | 0.0215 | 0.2742 |
| Currently on SERM vs AI | 1.27 (0.44, 3.66) | 0.6562 | 0.8208 |
| *AKT3* | Currently on AI | 0.71 (0.45, 1.13) | 0.1476 | 0.3850 |
| Currently on SERM | 0.25 (0.06, 1.07) | 0.0625 | 0.3611 |
| Currently on SERM vs AI | 1.29 (0.73, 2.28) | 0.3853 | 0.6139 |
| *PGR* | Currently on AI | 0.5 (0.16, 1.6) | 0.2444 | 0.4633 |
| Currently on SERM | 0.19 (0.04, 0.89) | 0.0352 | 0.3465 |
| Currently on SERM vs AI | 0.9 (0.22, 3.75) | 0.8846 | 0.9542 |
| *THY1* | Currently on AI | 0.59 (0.34, 1.03) | 0.0655 | 0.3611 |
| Currently on SERM | 0.19 (0.05, 0.73) | 0.0155 | 0.2742 |
| Currently on SERM vs AI | 1.18 (0.48, 2.92) | 0.7173 | 0.8608 |
| *CREBBP* | Currently on AI | 0.76 (0.49, 1.18) | 0.2242 | 0.4388 |
| Currently on SERM | 0.26 (0.07, 0.99) | 0.0476 | 0.3582 |
| Currently on SERM vs AI | 1.28 (0.76, 2.17) | 0.3567 | 0.6008 |
| *VIM* | Currently on AI | 0.8 (0.45, 1.4) | 0.4321 | 0.6523 |
| Currently on SERM | 0.27 (0.06, 1.26) | 0.0948 | 0.3614 |
| Currently on SERM vs AI | 0.99 (0.43, 2.3) | 0.9859 | 0.9898 |
| *MAPK10* | Currently on AI | 1.11 (0.68, 1.79) | 0.6817 | 0.8390 |
| Currently on SERM | 0.38 (0.13, 1.16) | 0.0896 | 0.3614 |
| Currently on SERM vs AI | 1.46 (0.63, 3.38) | 0.3743 | 0.6115 |
| *STAT1* | Currently on AI | 0.95 (0.63, 1.44) | 0.8246 | 0.9243 |
| Currently on SERM | 0.27 (0.09, 0.84) | 0.0231 | 0.2742 |
| Currently on SERM vs AI | 2.19 (1.27, 3.79) | 0.0048 | 0.2742 |
| *CLDN4 (claudin-4)* | Currently on AI | 1.13 (0.68, 1.87) | 0.6301 | 0.8065 |
| Currently on SERM | 0.4 (0.11, 1.44) | 0.1596 | 0.3890 |
| Currently on SERM vs AI | 0.9 (0.48, 1.66) | 0.7261 | 0.8632 |
| *HGF* | Currently on AI | 0.82 (0.5, 1.36) | 0.4470 | 0.6571 |
| Currently on SERM | 0.23 (0.06, 0.94) | 0.0410 | 0.3497 |
| Currently on SERM vs AI | 1.66 (0.93, 2.98) | 0.0862 | 0.3614 |
| *CLDN7 (claudin-7)* | Currently on AI | 1.02 (0.73, 1.42) | 0.9096 | 0.9674 |
| Currently on SERM | 0.38 (0.1, 1.42) | 0.1511 | 0.3850 |
| Currently on SERM vs AI | 1.15 (0.72, 1.84) | 0.5682 | 0.7708 |
| *CD10* | Currently on AI | 0.89 (0.54, 1.47) | 0.6480 | 0.8158 |
| Currently on SERM | 0.31 (0.07, 1.31) | 0.1097 | 0.3770 |
| Currently on SERM vs AI | 0.96 (0.48, 1.92) | 0.9002 | 0.9674 |
| *IGF1R* | Currently on AI | 1.06 (0.95, 1.19) | 0.2919 | 0.5287 |
| Currently on SERM | 0.47 (0.14, 1.51) | 0.2046 | 0.4180 |
| Currently on SERM vs AI | 5.86 (0.51, 66.8) | 0.1545 | 0.3877 |
| *EGFR* | Currently on AI | 1.52 (1.28, 1.81) | 0.0000 | 0.0007 |
| Currently on SERM | 0.7 (0.22, 2.2) | 0.5403 | 0.7518 |
| Currently on SERM vs AI | 0.79 (0.66, 0.93) | 0.0054 | 0.2742 |
| *EpCAM* | Currently on AI | 0.92 (0.61, 1.4) | 0.6998 | 0.8503 |
| Currently on SERM | 0.34 (0.1, 1.13) | 0.0790 | 0.3614 |
| Currently on SERM vs AI | 1.19 (0.62, 2.3) | 0.5947 | 0.7890 |
| *WNT2* | Currently on AI | 0.79 (0.47, 1.33) | 0.3793 | 0.6139 |
| Currently on SERM | 0.27 (0.07, 1.09) | 0.0660 | 0.3611 |
| Currently on SERM vs AI | 1.09 (0.54, 2.21) | 0.8177 | 0.9239 |
| *SNAI2* | Currently on AI | 0.61 (0.35, 1.05) | 0.0724 | 0.3611 |
| Currently on SERM | 0.22 (0.06, 0.79) | 0.0205 | 0.2742 |
| Currently on SERM vs AI | 1.17 (0.56, 2.48) | 0.6739 | 0.8321 |
| *PIK3CG* | Currently on AI | 0.81 (0.49, 1.34) | 0.4089 | 0.6306 |
| Currently on SERM | 0.25 (0.07, 0.95) | 0.0412 | 0.3497 |
| Currently on SERM vs AI | 2.03 (1.13, 3.65) | 0.0185 | 0.2742 |
| *CK8/18* | Currently on AI | 1.25 (0.8, 1.95) | 0.3254 | 0.5654 |
| Currently on SERM | 0.45 (0.11, 1.87) | 0.2708 | 0.5047 |
| Currently on SERM vs AI | 1.16 (0.55, 2.43) | 0.7025 | 0.8503 |
| *PTEN* | Currently on AI | 1.18 (0.78, 1.78) | 0.4450 | 0.6571 |
| Currently on SERM | 0.42 (0.13, 1.37) | 0.1507 | 0.3850 |
| Currently on SERM vs AI | 0.76 (0.43, 1.34) | 0.3381 | 0.5797 |
| *ERBB2* | Currently on AI | 0.87 (0.54, 1.38) | 0.5410 | 0.7518 |
| Currently on SERM | 0.32 (0.09, 1.21) | 0.0937 | 0.3614 |
| Currently on SERM vs AI | 1.04 (0.51, 2.11) | 0.9164 | 0.9694 |
| *CD24* | Currently on AI | 1.05 (0.62, 1.78) | 0.8565 | 0.9335 |
| Currently on SERM | 0.38 (0.12, 1.25) | 0.1112 | 0.3770 |
| Currently on SERM vs AI | 1.15 (0.65, 2.03) | 0.6206 | 0.8024 |
| *CDH1* | Currently on AI | 0.63 (0.42, 0.93) | 0.0194 | 0.2742 |
| Currently on SERM | 0.26 (0.08, 0.84) | 0.0239 | 0.2742 |
| Currently on SERM vs AI | 1.09 (0.52, 2.26) | 0.8180 | 0.9239 |
| *SNAI1* | Currently on AI | 1.04 (0.69, 1.55) | 0.8581 | 0.9335 |
| Currently on SERM | 0.39 (0.1, 1.54) | 0.1783 | 0.4013 |
| Currently on SERM vs AI | 0.83 (0.47, 1.47) | 0.5279 | 0.7425 |
| *CLDN3 (claudin-3)* | Currently on AI | 0.64 (0.44, 0.93) | 0.0190 | 0.2742 |
| Currently on SERM | 0.27 (0.09, 0.85) | 0.0252 | 0.2769 |
| Currently on SERM vs AI | 2.45 (1.29, 4.67) | 0.0065 | 0.2742 |
| *BLVRA* | Currently on AI | 1.32 (0.96, 1.83) | 0.0897 | 0.3614 |
| Currently on SERM | 0.39 (0.11, 1.34) | 0.1346 | 0.3850 |
| Currently on SERM vs AI | 1.49 (0.95, 2.36) | 0.0854 | 0.3614 |
| *SFRP1* | Currently on AI | 0.8 (0.52, 1.23) | 0.3147 | 0.5538 |
| Currently on SERM | 0.3 (0.08, 1.1) | 0.0693 | 0.3611 |
| Currently on SERM vs AI | 0.98 (0.5, 1.91) | 0.9416 | 0.9738 |
| *MYC* | Currently on AI | 0.78 (0.45, 1.35) | 0.3767 | 0.6130 |
| Currently on SERM | 0.3 (0.09, 0.96) | 0.0420 | 0.3497 |
| Currently on SERM vs AI | 0.82 (0.26, 2.55) | 0.7344 | 0.8703 |
| *IFT140* | Currently on AI | 0.91 (0.67, 1.22) | 0.5267 | 0.7425 |
| Currently on SERM | 0.35 (0.08, 1.52) | 0.1601 | 0.3890 |
| Currently on SERM vs AI | 0.98 (0.58, 1.66) | 0.9455 | 0.9738 |
| *PTTG1* | Currently on AI | 1.51 (0.89, 2.56) | 0.1275 | 0.3850 |
| Currently on SERM | 0.49 (0.16, 1.49) | 0.2088 | 0.4221 |
| Currently on SERM vs AI | 0.76 (0.38, 1.52) | 0.4358 | 0.6536 |
| *NAT1* | Currently on AI | 1.21 (0.84, 1.73) | 0.2998 | 0.5353 |
| Currently on SERM | 0.46 (0.11, 1.97) | 0.2976 | 0.5340 |
| Currently on SERM vs AI | 0.88 (0.37, 2.09) | 0.7689 | 0.8948 |
| *GPR160* | Currently on AI | 1.25 (0.91, 1.73) | 0.1709 | 0.3971 |
| Currently on SERM | 0.47 (0.17, 1.25) | 0.1289 | 0.3850 |
| Currently on SERM vs AI | 1.54 (0.87, 2.75) | 0.1410 | 0.3850 |
| *WNT5B* | Currently on AI | 0.65 (0.32, 1.3) | 0.2251 | 0.4388 |
| Currently on SERM | 0.21 (0.06, 0.8) | 0.0222 | 0.2742 |
| Currently on SERM vs AI | 0.95 (0.43, 2.11) | 0.9056 | 0.9674 |
| *PIK3CA* | Currently on AI | 0.84 (0.57, 1.25) | 0.3937 | 0.6145 |
| Currently on SERM | 0.32 (0.09, 1.12) | 0.0753 | 0.3613 |
| Currently on SERM vs AI | 0.86 (0.35, 2.11) | 0.7397 | 0.8740 |
| *GSK3B* | Currently on AI | 1.03 (0.55, 1.94) | 0.9319 | 0.9732 |
| Currently on SERM | 0.39 (0.12, 1.25) | 0.1143 | 0.3783 |
| Currently on SERM vs AI | 1.27 (0.53, 3.04) | 0.5850 | 0.7843 |
| *CRYBB2* | Currently on AI | 1.2 (0.76, 1.91) | 0.4331 | 0.6523 |
| Currently on SERM | 0.41 (0.1, 1.59) | 0.1963 | 0.4154 |
| Currently on SERM vs AI | 1.38 (0.69, 2.76) | 0.3689 | 0.6090 |
| *MUC1* | Currently on AI | 1.39 (0.96, 2.02) | 0.0820 | 0.3614 |
| Currently on SERM | 0.56 (0.17, 1.86) | 0.3462 | 0.5856 |
| Currently on SERM vs AI | 0.98 (0.51, 1.92) | 0.9635 | 0.9788 |
| *CD44* | Currently on AI | 1.23 (0.77, 1.97) | 0.3869 | 0.6139 |
| Currently on SERM | 0.44 (0.14, 1.4) | 0.1660 | 0.3971 |
| Currently on SERM vs AI | 0.63 (0.33, 1.2) | 0.1573 | 0.3890 |
| *SFRP2* | Currently on AI | 0.65 (0.39, 1.07) | 0.0879 | 0.3614 |
| Currently on SERM | 0.24 (0.06, 0.97) | 0.0458 | 0.3515 |
| Currently on SERM vs AI | 1.02 (0.45, 2.3) | 0.9614 | 0.9788 |
| *CD29* | Currently on AI | 0.39 (0.19, 0.82) | 0.0130 | 0.2742 |
| Currently on SERM | 0.13 (0.03, 0.55) | 0.0052 | 0.2742 |
| Currently on SERM vs AI | 2.12 (0.84, 5.34) | 0.1108 | 0.3770 |
| *BCL2* | Currently on AI | 0.71 (0.48, 1.03) | 0.0689 | 0.3611 |
| Currently on SERM | 0.28 (0.08, 0.96) | 0.0428 | 0.3497 |
| Currently on SERM vs AI | 1.19 (0.62, 2.29) | 0.6061 | 0.7969 |
| *CD27* | Currently on AI | 0.67 (0.41, 1.09) | 0.1078 | 0.3770 |
| Currently on SERM | 0.17 (0.04, 0.73) | 0.0175 | 0.2742 |
| Currently on SERM vs AI | 2.65 (1.5, 4.67) | 0.0008 | 0.1442 |
| *MLPH* | Currently on AI | 0.9 (0.57, 1.44) | 0.6678 | 0.8272 |
| Currently on SERM | 0.35 (0.1, 1.2) | 0.0937 | 0.3614 |
| Currently on SERM vs AI | 1.48 (0.64, 3.46) | 0.3603 | 0.6016 |
| *TWIST2* | Currently on AI | 0.99 (0.77, 1.28) | 0.9394 | 0.9738 |
| Currently on SERM | 0.38 (0.11, 1.29) | 0.1211 | 0.3842 |
| Currently on SERM vs AI | 0.74 (0.38, 1.46) | 0.3841 | 0.6139 |
| *LEF1* | Currently on AI | 1.05 (0.79, 1.41) | 0.7210 | 0.8612 |
| Currently on SERM | 0.38 (0.09, 1.6) | 0.1878 | 0.4122 |
| Currently on SERM vs AI | 1.07 (0.56, 2.03) | 0.8470 | 0.9311 |
| *SLC39A6* | Currently on AI | 0.87 (0.49, 1.54) | 0.6287 | 0.8065 |
| Currently on SERM | 0.32 (0.07, 1.37) | 0.1236 | 0.3850 |
| Currently on SERM vs AI | 1.29 (0.86, 1.95) | 0.2247 | 0.4388 |
| *WDR77* | Currently on AI | 0.82 (0.53, 1.28) | 0.3908 | 0.6145 |
| Currently on SERM | 0.32 (0.09, 1.17) | 0.0856 | 0.3614 |
| Currently on SERM vs AI | 1.55 (0.82, 2.95) | 0.1812 | 0.4046 |
| *PHGDH* | Currently on AI | 0.89 (0.59, 1.34) | 0.5635 | 0.7708 |
| Currently on SERM | 0.32 (0.08, 1.25) | 0.1008 | 0.3685 |
| Currently on SERM vs AI | 1.2 (0.56, 2.57) | 0.6364 | 0.8091 |
| *BORCS7* | Currently on AI | 0.85 (0.59, 1.21) | 0.3619 | 0.6017 |
| Currently on SERM | 0.32 (0.1, 1.01) | 0.0515 | 0.3585 |
| Currently on SERM vs AI | 1.46 (0.67, 3.2) | 0.3411 | 0.5803 |
| *BCL2L1* | Currently on AI | 0.62 (0.41, 0.94) | 0.0227 | 0.2742 |
| Currently on SERM | 0.23 (0.07, 0.82) | 0.0233 | 0.2742 |
| Currently on SERM vs AI | 1.18 (0.59, 2.34) | 0.6390 | 0.8098 |
| *EGF* | Currently on AI | 1.1 (0.7, 1.72) | 0.6896 | 0.8433 |
| Currently on SERM | 0.38 (0.12, 1.19) | 0.0961 | 0.3614 |
| Currently on SERM vs AI | 1.15 (0.61, 2.16) | 0.6622 | 0.8244 |
| *FGFR4* | Currently on AI | 0.99 (0.76, 1.29) | 0.9478 | 0.9738 |
| Currently on SERM | 0.2 (0.05, 0.85) | 0.0288 | 0.2985 |
| Currently on SERM vs AI | 0.17 (0.02, 1.38) | 0.0981 | 0.3621 |
| *GPC4* | Currently on AI | 1.28 (0.91, 1.8) | 0.1617 | 0.3906 |
| Currently on SERM | 0.44 (0.15, 1.3) | 0.1379 | 0.3850 |
| Currently on SERM vs AI | 1.22 (0.73, 2.03) | 0.4402 | 0.6552 |
| *ZEB1* | Currently on AI | 0.61 (0.41, 0.91) | 0.0163 | 0.2742 |
| Currently on SERM | 0.2 (0.06, 0.73) | 0.0149 | 0.2742 |
| Currently on SERM vs AI | 1.05 (0.52, 2.14) | 0.8846 | 0.9542 |
| *ITGB6* | Currently on AI | 1.69 (0.73, 3.94) | 0.2233 | 0.4388 |
| Currently on SERM | 0.39 (0.11, 1.4) | 0.1508 | 0.3850 |
| Currently on SERM vs AI | 0.26 (0.07, 1) | 0.0503 | 0.3585 |
| *ESR1* | Currently on AI | 0.76 (0.44, 1.31) | 0.3209 | 0.5601 |
| Currently on SERM | 0.33 (0.1, 1.13) | 0.0771 | 0.3613 |
| Currently on SERM vs AI | 2.28 (0.68, 7.68) | 0.1834 | 0.4048 |
| *SQLE* | Currently on AI | 0.5 (0.27, 0.92) | 0.0265 | 0.2829 |
| Currently on SERM | 0.22 (0.07, 0.69) | 0.0093 | 0.2742 |
| Currently on SERM vs AI | 1.87 (0.86, 4.05) | 0.1129 | 0.3770 |
